1 **Expansion of the fatty acyl reductase gene family shaped pheromone**  
2 **communication in Hymenoptera**

3  
4  
5 Michal Tupec<sup>1,§</sup>, Aleš Buček<sup>1,2,§,\*</sup>, Heiko Vogel<sup>3</sup>, Václav Janoušek<sup>4</sup>, Darina Prchalová<sup>1</sup>, Jiří  
6 Kindl<sup>1</sup>, Tereza Pavlíčková<sup>1</sup>, Petra Wenzelová<sup>1</sup>, Ullrich Jahn<sup>1</sup>, Irena Valterová<sup>1</sup> and Iva Pichová<sup>1,\*</sup>

7  
8 <sup>1</sup>Institute of Organic Chemistry and Biochemistry of the Czech Academy of Sciences, Prague,  
9 Czech Republic

10 <sup>2</sup>Okinawa Institute of Science and Technology Graduate University, Onna-son, Okinawa, Japan

11 <sup>3</sup>Department of Entomology, Max Planck Institute for Chemical Ecology, Jena, Germany

12 <sup>4</sup>Department of Zoology, Faculty of Science, Charles University in Prague, Prague, Czech  
13 Republic

14 <sup>§</sup>These authors contributed equally.

15 <sup>\*</sup>Corresponding authors. E-mail: IP: [iva.pichova@uochb.cas.cz](mailto:iva.pichova@uochb.cas.cz); AB: [ales.bucek@oist.jp](mailto:ales.bucek@oist.jp)

16

17

18

## 19 **Abstract**

20 The conserved fatty acyl reductase (FAR) family is involved in biosynthesis of fatty alcohols that  
21 serve a range of biological roles. In moths, butterflies (Lepidoptera), and bees (Hymenoptera),  
22 FARs biosynthesize fatty alcohol pheromones participating in mate-finding strategies. Using a  
23 combination of next-generation sequencing, analysis of transposable elements (TE) in the  
24 genomic environment of FAR genes, and functional characterization of FARs from *Bombus*  
25 *lucorum*, *B. lapidarius*, and *B. terrestris*, we uncovered a massive expansion of the FAR gene  
26 family in Hymenoptera, presumably facilitated by TEs. Expansion occurred in the common  
27 ancestor of bumblebees (Bombini) and stingless bees (Meliponini) after their divergence from the  
28 honeybee lineage. We found that FARs from the expanded FAR-A orthology group contributed to  
29 the species-specific male marking pheromone composition. Our results indicate that TE-mediated  
30 expansion and functional diversification of the FAR gene family played a key role in the  
31 evolution of pheromone communication in the crown group of Hymenoptera.

32

33

34

35

36 **Abbreviations:** MMP: male marking pheromone, FA: fatty acid, FAME: fatty acid methyl ester,

37 FAR: fatty acyl reductase, LG: labial gland, FB: fat body, TE: transposable element.

38

## 39 **Introduction**

40 Accumulation of DNA sequencing data is greatly outpacing our ability to experimentally assess  
41 the function of the sequenced genes, and most of these genes are expected to never be  
42 functionally characterized<sup>1</sup>. Important insights into the evolutionary processes shaping the  
43 genomes of individual species or lineages can be gathered from predictions of gene families, gene  
44 orthology groups and gene function. However, direct experimental evidence of the function of  
45 gene family members is often unavailable or limited<sup>2-6</sup>. Gene duplication is hypothesized to be  
46 among the major genetic mechanisms of evolution<sup>7,8</sup>. Although the most probable evolutionary  
47 fate of duplicated genes is the loss of one copy, the temporary redundancy accelerates gene  
48 sequence divergence and can result in gene subfunctionalization or neofunctionalization—  
49 acquisition of slightly different or completely novel functions in one copy of the gene<sup>9,10</sup>.

50 The alcohol-forming fatty acyl-CoA reductases (FARs, EC 1.2.1.84) belong to a  
51 multigene family that underwent a series of gene duplications and subsequent gene losses,  
52 pseudogenizations and possibly functional diversification of some of the maintained copies,  
53 following the birth-and-death model of gene family evolution<sup>11</sup>. FARs exhibit notable trends in  
54 gene numbers across organism lineages; there are very few FAR genes in fungi, vertebrates and  
55 non-insect invertebrates such as *Caenorhabditis elegans*, whereas plant and insect genomes  
56 typically harbour extensive FAR gene family members<sup>11</sup>. FARs are critical for production of  
57 primary fatty alcohols, which are naturally abundant fatty acid (FA) derivatives with a wide  
58 variety of biological roles. Fatty alcohols are precursors of waxes and other lipids that serve as  
59 surface-protective or hydrophobic coatings in plants, insects and other animals<sup>12-14</sup>; precursors of  
60 energy-storing waxes<sup>15-17</sup>; and components of ether lipids abundant in the cell membranes of  
61 cardiac, nervous and immunological tissues<sup>18</sup>.

62 Additionally, in some insect lineages, FARs were recruited for yet another task—  
63 biosynthesis of fatty alcohols that serve as pheromones or pheromone precursors. Moths

64 (Lepidoptera) are the most well-studied model of insect pheromone biosynthesis and have been  
65 the subject of substantial research effort related to FARs. Variation in FAR enzymatic specificities  
66 is a source of sex pheromone signal diversity among moths in the genus *Ostrinia*<sup>19</sup> and is also  
67 responsible for the distinct pheromone composition in two reproductively isolated races of the  
68 European corn borer *Ostrinia nubilalis*<sup>20</sup>. Divergence in pheromone biosynthesis can potentially  
69 install or strengthen reproductive barriers, ultimately leading to speciation<sup>21</sup>. However, the  
70 biological significance of a large number of insect FAR paralogs remains unclear, as all FARs  
71 implicated in moth and butterfly sex pheromone biosynthesis are restricted to a single clade,  
72 indicating that one FAR group was exclusively recruited for pheromone biosynthesis<sup>20,22–24</sup>.  
73 While more than 20 FARs have been experimentally characterized from 23 moth and butterfly  
74 (Lepidoptera) species<sup>25</sup>, FARs from other insect orders have received far less attention. Single  
75 FAR genes have been isolated and experimentally characterized from *Drosophila* (Diptera)<sup>14</sup>, the  
76 European honeybee (Hymenoptera)<sup>26</sup> and the scale insect *Ericerus pela* (Hemiptera)<sup>27</sup>. Our  
77 limited knowledge about FAR function prevents us from drawing inferences about the biological  
78 significance of the FAR gene family expansion in insects.

79 Bumblebees (Hymenoptera: Apidae) are a convenient experimental model to study  
80 insect FAR evolution because the majority of bumblebee species produces fatty alcohols as  
81 species-specific components of male marking pheromones (MMPs)<sup>28</sup>, which are presumed to be  
82 biosynthesized by some of the numerous bumblebee FAR gene family members<sup>29</sup>. Bumblebee  
83 males employ MMPs to attract conspecific virgin queens<sup>30</sup>. In addition to fatty alcohols, MMPs  
84 generally contain other FA derivatives and terpenoid compounds. The MMP composition serves  
85 as a phylogenetic signal and can be used as a taxonomic tool to discriminate bumblebee species  
86 and subspecies<sup>31–33</sup>. Pheromones from three common European bumblebee species, *B. terrestris*,  
87 *B. lucorum* and *B. lapidarius*, represent the diversity of fatty alcohol MMP components. Fatty  
88 alcohols are the major compounds in MMPs of *B. lapidarius* (hexadecanol and Z9-hexadecenol)

89 and accompanying electroantennogram-active compounds in *B. terrestris* (hexadecanol,  
90 octadecatrienol, octadecenol) and *B. lucorum* (hexadecanol, Z9,Z12-octadecadienol, Z9,Z12,Z15-  
91 octadecatrienol, octadecanol)<sup>34-40</sup>.

92 In our previous investigation of the molecular basis of pheromone diversity in  
93 bumblebees, we found that the substrate specificities of fatty acyl desaturases (FADs), enzymes  
94 presumably acting upstream of FARs in pheromone biosynthesis<sup>41</sup>, are conserved across species  
95 despite differences in the compositions of their unsaturated FA-derived pheromone components<sup>42</sup>.  
96 These findings suggest that the substrate specificity of FADs expressed in the male bumblebee  
97 MMP-producing labial gland (LG) contributes only partially to the species-specific composition  
98 of FA-derived MMPs<sup>42</sup>. The fatty alcohol content in bumblebee MMPs is therefore presumably  
99 co-determined by the enzymatic specificity of other pheromone biosynthetic steps, such as FA  
100 biosynthesis/transport or FA reduction. Analysis of the *B. terrestris* male LG transcriptome  
101 uncovered a remarkably high number of putative FAR paralogs, including apparently expressed  
102 pseudogenes, strongly indicating dynamic evolution of the FAR gene family<sup>29</sup>.

103 Here, we aimed to determine how the members of the large FAR gene family in the  
104 bumblebee lineage contribute to MMP biosynthesis. We sequenced and analysed *B. lucorum* and  
105 *B. lapidarius* male LG and FB transcriptomes and functionally characterized the FAR enzymes,  
106 along with FAR candidates from *B. terrestris*, in a yeast expression system. We combined  
107 experimental information about FAR enzymatic specificities with quantitative information about  
108 bumblebee FAR expression patterns, as well as comprehensive GC analysis of MMPs and their  
109 FA precursors in the bumblebee male LG, with inference of the hymenopteran FAR gene tree. In  
110 addition, we investigated the content of transposable elements (TE) in the genomic environment  
111 of FAR genes in *B. terrestris*. We concluded that a dramatic TE-mediated expansion of the FAR  
112 gene family started in the common ancestor of the bumblebee (Bombini: *Bombus*) and stingless

113 bee (Meliponini) lineages, which presumably shaped the pheromone communication in these  
114 lineages.

## 115 **Results**

### 116 **Identification of FARs in bumblebee transcriptomes**

117 We sequenced, assembled and annotated male LG and male fat body (FB) transcriptomes of two  
118 bumblebee species, *B. lucorum* and *B. lapidarius*. LG is the MMP-producing organ and is  
119 markedly enlarged in males, while FB was used as a reference tissue not directly involved in  
120 MMP biosynthesis<sup>43</sup>. Searches of the LG and FB transcriptomes of *B. lucorum* and *B. lapidarius*  
121 and the previously sequenced FB and LG transcriptomes of *B. terrestris*<sup>29</sup> yielded 12, 26, and 16  
122 expressed FAR homologs in *B. lapidarius*, *B. terrestris*, and *B. lucorum*, respectively  
123 (Supplementary Fig. 1).

124

### 125 **FAR gene family evolution in Hymenoptera**

126 To gain insight into the evolution of FAR gene family in Hymenoptera, we reconstructed a FAR  
127 gene tree using predicted FARs from species representing ants, wasps, parasitic wasps and  
128 several bee lineages (Fig. 1). We assigned the names FAR-A to FAR-K to 11 FAR orthology  
129 groups that were retrieved as branches with high bootstrap support in the FAR gene tree. These  
130 orthology groups typically encompass one or more orthologs from each of the hymenopteran  
131 species used in the tree inference, with the exception of apparent species-specific FAR  
132 duplications or losses (Fig. 1). Notably, we identified a massive expansion of the FAR-A  
133 orthology group in the bumblebee and stingless bee (subfamily Meliponini) lineages, the two  
134 most closely related lineages in our dataset. The number of FAR homologs is inflated by a large  
135 number of FAR transcripts with incomplete protein coding sequences lacking catalytically critical  
136 regions such as the putative active site, NAD(P)<sup>+</sup> binding site or substrate binding site (Fig. 1,

137 Supplementary Table 1). We also inferred a FAR gene tree encompassing FARs from three  
138 representatives of non-hymenopteran insect orders—the beetle *Tribolium castaneum*, the moth  
139 *Bombyx mori* and the fly *Drosophila melanogaster* (Supplementary Fig. 2). The only functionally  
140 characterized FAR from *D. melanogaster*—Waterproof (NP\_651652.2), which is involved in  
141 biosynthesis of a protective wax layer<sup>14</sup>—was placed in the FAR-J orthology group  
142 (Supplementary Fig. 2). The FAR-G orthology group includes a FAR gene from *Apis mellifera*  
143 with unclear biological function<sup>26</sup> and a sex pheromone-biosynthetic FAR from *B. mori*<sup>44</sup>  
144 (Supplementary Fig. 2). In the gene tree, the majority of FAR orthology groups contain predicted  
145 FARs from both hymenopteran and non-hymenopteran insect species. These orthology groups are  
146 presumably ancestral to insects. Only FAR-D and FAR-K do not include any non-hymenopteran  
147 FARs from our dataset and thus presumably represent hymenoptera-specific FAR gene family  
148 expansions (Supplementary Fig. 2).

#### 149 **Genomic organization and TE content**

150 To uncover the details of genetic organization of FAR-A genes, we attempted to analyse the  
151 shared synteny of FAR genes in the genomes of *B. terrestris* and *A. mellifera*<sup>45</sup>. We aligned the  
152 *A. mellifera* and *B. terrestris* genomes, but we were not able to identify any positional *A. mellifera*  
153 homologs of *B. terrestris* FAR-A genes (data not shown). While the majority of FAR genes  
154 belonging to the non-FAR-A gene orthology group localize to the *B. terrestris* genome assembled  
155 to linkage groups, most of the *B. terrestris* FAR-A genes localize to unlinked short scaffolds  
156 (Supplementary Table 2). Some of the FAR-A genes in the *B. terrestris* genome are arranged in  
157 clusters (Supplementary Fig. 3).

158 A genome assembly consisting of short scaffolds is often indicative of a repetitive  
159 structure in the assembled genomic region. Our analysis of the distribution of TEs in the vicinity  
160 of FAR genes in the *B. terrestris* genome confirmed that TEs are significantly enriched around  
161 FAR-A genes compared to the genome-wide average around randomly selected genes

162 ( $p < 0.0001$ ). FAR-A genes have on average more than 50% of their 10-kb surrounding region  
163 formed by TEs compared to an average 10% around randomly selected *B. terrestris* genes. In  
164 contrast, the densities of TEs in the vicinity of FAR genes not belonging to the FAR-A group do  
165 not differ from the genome-wide average ( $p = 0.1041$ ; Fig. 2). Although all major known TE  
166 families are statistically enriched in the neighbourhood of the FAR-A genes (Fig. 2), the Class I  
167 comprising retroid elements contributes considerably to the elevated repeat content around FAR-  
168 A genes.

169

### 170 **Tissue-specific expression**

171 We selected 10 promising MMP-biosynthetic FAR candidates that were 1) among the 100 most  
172 abundant transcripts in the LG and were substantially more abundant in LG than in FB based on  
173 RNA-Seq-derived normalized expression values (Supplementary Fig. 1 and ref. <sup>29</sup>) and 2)  
174 included in the protein coding sequence all the predicted catalytically critical regions of FARs—  
175 the putative active site, NAD(P)<sup>+</sup> binding site and substrate binding site (Supplementary Table 1).

176 By employing RT-qPCR in an expanded set of bumblebee tissues, we confirmed that the  
177 FAR candidates follow a general trend of overexpression in male LG compared to FB, flight  
178 muscle and gut (all from male bumblebees) and virgin queen LG (Fig. 3, Supplementary Fig. 4,  
179  $p < 0.05$ , one-way ANOVA followed by *post-hoc* Tukey's HSD test). Notably, *B. lapidarius* FAR-  
180 A1 (*Blap*FAR-A1) and *B. terrestris* FAR-J (*Bter*FAR-J) transcripts are also abundant in virgin  
181 queen LG, where they are expressed at levels comparable to those in male LG (Fig. 3,  
182 Supplementary Fig. 4).

183

### 184 **Cloning and functional characterization**

185 The full-length coding regions of the FAR candidates were isolated from male LG cDNA  
186 libraries using gene-specific PCR primers (Supplementary Table 3). In general, the FAR



187 candidates share high to very high protein sequence similarity within each orthology group. FARs  
188 from three bumblebee species belonging to the FAR-J orthology group are nearly identical,  
189 sharing 97.2–99.7% protein sequence identity; *Bluc*FAR-A1 and *Bter*FAR-A1 share 99.4%  
190 protein sequence identity with each other and 60.9–61.1% with *Blap*FAR-A1. *Bluc*FAR-A2 and  
191 *Bter*FAR-A2 share 94.8% protein sequence identity (Supplementary Table 4). *Bluc*FAR-J was not  
192 cloned because of its very high similarity to *Bter*FAR-J (99.7% sequence identity, two amino acid  
193 differences). We cloned two versions of *Blap*FAR-A1: one that was custom-synthesized based on  
194 the predicted full-length coding sequence assembled from RNA-Seq data and one called  
195 *Blap*FAR-A1-short that we consistently PCR-amplified from *B. lapidarius* male LG cDNA.  
196 *Blap*FAR-A1-short has an in-frame internal 66 bp deletion in the coding region that does not  
197 disrupt the predicted active site, putative NAD(P)<sup>+</sup> binding site or putative substrate binding site.  
198 Using RT-qPCR with specific primers for each variant, we confirmed that both *Blap*FAR-A1 and  
199 *Blap*FAR-A1-short are expressed in the *B. lapidarius* male LG and virgin queen LG  
200 (Supplementary Fig. 5).

201 To test whether the MMP-biosynthetic FAR candidates code for enzymes with fatty acyl  
202 reductase activity and to uncover their substrate specificities, we cloned the candidate FAR  
203 coding regions into yeast expression plasmids, heterologously expressed the FARs in  
204 *Saccharomyces cerevisiae* and assayed the fatty alcohol production by GC (Supplementary Fig. 8  
205 and Supplementary Fig. 9). His-tagged FARs were detected in all yeast strains transformed with  
206 plasmids bearing FARs (Fig. 4, Supplementary Fig. 11a), while no His-tagged proteins were  
207 detected in the negative control (yeast strain transformed with an empty plasmid). In addition to  
208 the major protein bands corresponding to the theoretical FAR molecular weight, we typically  
209 observed protein bands with lower and/or higher molecular weight (Fig. 4a). The synthetic  
210 *Bluc*FAR-A1-opt and *Bluc*FAR-A2-opt coding regions with codon usage optimized for *S.*  
211 *cerevisiae* showed a single major Western blot signal corresponding to the position of the

212 predicted full-length protein (Fig. 4a). The shortened heterologously expressed proteins thus  
213 presumably represent incompletely transcribed versions of full-length FARs resulting from  
214 ribosome stalling<sup>46</sup>, while the higher molecular weight bands might correspond to aggregates of  
215 full-length and incompletely translated FARs. Because the codon-optimized *BlucFAR-A1-opt* and  
216 *BlucFAR-A2-opt* exhibit the same overall specificity in yeast expression system as the respective  
217 non-codon-optimized FARs (Supplementary Fig. 6), we employed non-codon-optimized FARs  
218 for further functional characterization. We only used the codon-optimized versions of *BlucFAR-*  
219 *A1* and *BlucFAR-A2* in experiments with exogenously supplemented substrates to increase the  
220 possibility of product detection, as the optimized FARs produce overall higher quantities of fatty  
221 alcohols ( $p < 0.05$ , two-tailed *t*-test).

222 Characterization of FAR enzymatic activities involved identification of numerous  
223 individual FA derivatives, denoted using the position/configuration of the double bond if present  
224 (e.g., *Z9*), the length of the carbon chain (e.g., 20), the number of double bonds (e.g., ":" or ":1"  
225 for saturated and monounsaturated FAs, respectively) and the C1 moiety (COOH for acid, OH for  
226 alcohol, Me for methyl ester, CoA for CoA-thioester).

227 Functional characterization of FARs from *B. terrestris* and *B. lucorum* in yeast indicated  
228 that saturated C16 to C26 fatty alcohols are produced by both *Bter/BlucFAR-A1* and *BterFAR-J*  
229 enzymes (Fig. 5ad, Supplementary Fig. 9); *Bter/BlucFAR1* prefers C22 substrates, whereas  
230 *BterFAR-J* has an optimal substrate preference slightly shifted to C24. Unlike any of the other  
231 characterized FARs, *Bter/BlucFAR-A1* are also capable of reducing supplemented  
232 monounsaturated *Z15-20:1* acyl to the corresponding alcohol (Fig. 5a and Supplementary Fig.  
233 10c). Both *BterFAR-A2* and *BlucFAR-A2* reduce only 16: and 18: acyls (Fig. 5c, Supplementary  
234 Fig. 8).

235 Characterization of *B. lapidarius* FARs showed that *BlapFAR-A1*, in contrast to  
236 *Bter/BlucFAR-A1*, produces *Z9-16:1OH* and *Z9-18:1OH* (Fig. 5A and Supplementary Fig. 8).

237 *BlapFAR-A4* produces 16:OH and Z9-16:1OH, together with lower quantities of 14:OH and  
238 Z9-18:1OH (Fig. 5b, Supplementary Fig. 7, Supplementary Fig. 8). *BlapFAR-A5* produces  
239 16:OH as a major product and lower amounts of 14:OH, Z9-16:1OH, 18:OH and Z9-18:1OH  
240 (Fig. 5b, Supplementary Fig. 7, Supplementary Fig. 8). In addition, both *BlapFAR-A1* and  
241 *BlapFAR-A4* are capable of reducing supplemented polyunsaturated fatty acyls (Z9,Z12-18:2 and  
242 Z9,Z12,Z15-18:3) to their respective alcohols (Fig. 5ab and Supplementary Fig. 10ab). Similarly  
243 to *BterFAR-J*, *BlapFAR-J* also reduces saturated C16 to C26 acyls (Fig. 5d and Supplementary  
244 Fig. 9). No fatty alcohols were detected in the negative control (Supplementary Fig. 8). We did  
245 not detect the formation of fatty aldehydes in any of the yeast cultures (data not shown),  
246 confirming that the studied FARs are strictly alcohol-forming fatty acyl-CoA reductases. In  
247 contrast to *BlapFAR-A1*, *BlapFAR-A1-short* does not produce detectable amounts of any fatty  
248 alcohol (Supplementary Fig. 11b), suggesting that the missing 22-amino acid region is crucial for  
249 the retention of FAR activity (Supplementary Fig. 8).

250

## 251 **Quantification of fatty alcohols and fatty acyls in bumblebee male LG and FB**

252 In addition to functional characterization of FARs in a heterologous host, we performed a detailed  
253 analysis of transesterifiable fatty acyls (free FAs and fatty acyls bound in esters) and fatty  
254 alcohols in LGs and FBs of 3-day-old *B. lapidarius*, *B. terrestris* and *B. lucorum* males (Fig. 6,  
255 Supplementary Table 5 and Supplementary Table 6).

256 A limited number of fatty alcohols (mainly 16:OH, Z9,Z12-18:2OH and  
257 Z9,Z12,Z15-18:3OH) were detected in FBs of *B. lucorum* and *B. terrestris* (Supplementary Table  
258 6), but at substantially lower abundance than in LGs. In the LGs, 4, 14, and 19 individual fatty  
259 alcohol compounds were detected in *B. lapidarius*, *B. lucorum* and *B. terrestris*, respectively  
260 (Supplementary Table 5). To assess the apparent *in-vivo* specificity of FARs in LGs and FBs, we  
261 calculated the ratios of amounts of each fatty alcohol to the amount of its hypothetical fatty acyl

262 precursors (Supplementary Fig. 12). The fatty alcohol ratios are greater than 50% for most of the  
263 fatty alcohols in LGs and even approach 100% for some of the monounsaturated C20+ fatty  
264 alcohols (Supplementary Fig. 12ab), as the corresponding fatty acyls could not be quantified due  
265 to low abundance, suggesting that the FARs acting on these fatty chains convert almost all of the  
266 acyl substrate to alcohol. The specificities of the characterized FARs determined in yeast  
267 correlate well with the composition of LG fatty alcohols and fatty acyls (Fig. 6), except for  
268 Z9,Z12-18:2OH and Z9,Z12,Z15-18:3OH, as none of the studied FARs from *B. lucorum* or *B.*  
269 *terrestris* reduce the corresponding acyls.

## 270 **Discussion**

271 Since the first genome-scale surveys of gene families, gene duplications and lineage-specific  
272 gene family expansions have been considered major mechanisms of diversification and  
273 adaptation in eukaryotes<sup>2</sup> and prokaryotes<sup>47</sup>. Tracing the evolution of gene families and  
274 correlating them with the evolution of phenotypic traits has been facilitated by the growing  
275 number of next-generation genomes and transcriptomes from organisms spanning the entire tree  
276 of life. However, obtaining experimental evidence of the function of numerous gene family  
277 members across multiple species or lineages is laborious. Thus, such data are scarce, and  
278 researchers have mostly relied on computational inference of gene function<sup>48</sup>. Here, we aimed to  
279 combine computational inference with experimental characterization of gene function to  
280 understand the evolution of the FAR family, for which we predicted a notable gene number  
281 expansion in our initial transcriptome analysis of the buff-tailed bumblebee *B. terrestris*<sup>29</sup>. We  
282 specifically sought to determine whether the FARs that emerged through expansion of the FAR  
283 gene family substantially contribute to MMP biosynthesis in bumblebees.

284 We identified a massive expansion of the FAR-A orthologous gene group in stingless  
285 bees and bumblebees. The sister taxonomic relationship of these taxa and their position as a

286 crown group within the bee (Anthophila) clade<sup>49–51</sup> indicates that the FAR duplication process  
287 occurred or started in the common ancestor of bumblebees and stingless bees. According to  
288 estimated lineage divergence times, FAR duplication events started 76–85 million years ago after  
289 their divergence from *Apis* 82–93 million years ago<sup>52</sup>. The number of inferred FAR-A orthologs  
290 is inflated by predicted pseudogenes—FARs with fragmented coding sequences that lack some of  
291 the catalytically essential domains and motifs (Supplementary Fig. 2). These predicted  
292 catalytically inactive yet highly expressed FAR-A pseudogenes might play a role in regulating the  
293 FAR-catalysed reduction<sup>53</sup>. The number of predicted FAR-A pseudogenes indicate that the FAR-  
294 A orthology group expansion in this lineage was a highly dynamic process (Fig. 1,  
295 Supplementary Fig. 2). The high number of species-specific FAR-A duplications or losses  
296 between the closely related species *B. lucorum* and *B. terrestris*, which diverged approximately 5  
297 million years ago<sup>54</sup>, further indicates the dynamic evolutionary processes acting on the FAR gene.

298 Strikingly, stingless bees also employ LG secretion in scent marking<sup>55</sup>. In worker  
299 stingless bees, LG secretion is used as a trail pheromone to recruit nestmates to food resources  
300 and generally contains fatty alcohols such as hexanol, octanol, and decanol in the form of their  
301 fatty acyl esters<sup>56,57</sup>. The correlation between FAR-A gene orthologous group expansion and use  
302 of LG-produced fatty alcohols as marking pheromones suggests a critical role for FAR-A gene  
303 group expansion in the evolution of scent marking. In the future, identification and  
304 characterization of FAR candidates involved in production of stingless bee worker LG-secretion  
305 could corroborate this hypothesis.

306 Bumblebee orthologs (FAR-G) of *B. mori* pheromone-biosynthetic FARs<sup>44</sup> are not  
307 abundantly or specifically expressed in male bumblebee LGs, as evidenced by RNA-Seq RPKM  
308 values (Supplementary Fig. 1). MMP-biosynthetic FARs in bumblebees and female sex  
309 pheromone-biosynthetic FARs in moths (Lepidoptera) were most likely recruited independently  
310 for the tasks of pheromone biosynthesis.

311 Various models have attempted to describe the evolutionary mechanisms leading to the  
312 emergence and maintenance of gene duplicates<sup>10</sup>. The fragmented state of the *B. terrestris*  
313 genome and its limited synteny with the *A. mellifera* genome restricts our ability to reconstruct  
314 the genetic events accompanying the FAR duplications resulting in the FAR-A orthology group  
315 expansion. Taking into consideration the large quantities of MMPs in bumblebee males, we  
316 speculate that gene dosage benefits could substantially contribute to the duplications and  
317 duplicate fixation of MMP-biosynthetic FARs. Under this model, selection for increased amounts  
318 of fatty alcohols could fix the duplicated FARs in a population<sup>2,10</sup>. The MMP quantities in bees  
319 are substantially higher than quantities of pheromones in other insects of comparable size. For  
320 example, *B. terrestris*, *B. lucorum*, and *B. lapidarius* bumblebee males can produce several  
321 milligrams of MMPs (Kindl, personal communication), while the sphingid moth *Manduca sexta*  
322 produces tens of nanograms of sex pheromone<sup>58</sup>. Sexual selection favouring bumblebee males  
323 capable of producing large quantities of MMPs thus might have served as the evolutionary driver  
324 for repeated FAR-A duplication.

325 Mechanistically, gene duplications can be facilitated by associated TEs<sup>59-61</sup>. The content  
326 of repetitive DNA in the *B. terrestris* and *B. impatiens* genome assemblies is 14.8% and 17.9%,  
327 respectively<sup>62</sup>, which is lower than in other insects such as the beetle *Tribolium castaneum*  
328 (30%), *Drosophila* (more than 20%) or the wasp *Nasonia vitripennis* (more than 30%) but  
329 substantially higher than in the honeybee *Apis mellifera* (9.5%)<sup>63,64</sup>. Our finding that TEs are  
330 enriched in the vicinity of FAR-A genes in the *B. terrestris* genome indicates that TEs  
331 presumably contributed to the massive expansion of the FAR-A orthology group (Fig. 2). One  
332 possible scenario is that the FAR-A gene in the common ancestor of bumblebees and stingless  
333 bees translocated to a TE-rich region, which subsequently facilitated expansions of this orthology  
334 group.

335 We have previously shown that the transcript levels of biosynthetic genes generally  
336 reflect the biosynthetic pathways most active in bumblebee LG<sup>29,42</sup>. For further experimental  
337 characterization, we therefore selected the FAR-A and FAR-J gene candidates, which exhibited  
338 high and preferential expression in male LG. The abundant expression of *Blap*FAR-A1 and  
339 *Bter*FAR-J in both virgin queen and male LG suggests that these FARs might also have been  
340 recruited for production of queen-specific signals<sup>65</sup>.

341 The spectrum of fatty alcohols in *B. terrestris* and *B. lucorum* male LG differs  
342 substantially from that of *B. lapidarius*. In both *B. terrestris* and *B. lucorum*, the male LG extract  
343 contains a rich blend of C14–C26 fatty alcohols with zero to three double bonds (Fig. 6,  
344 Supplementary Table 5). In *B. lapidarius*, the male LG extract is less diverse and dominated by  
345 Z9-16:1OH and 16:OH (Fig. 6 and Supplementary Table 5). The functional characterization of  
346 LG-expressed FARs uncovered how the distinct repertoire of LG-expressed FAR orthologs,  
347 together with differences in FAR substrate specificities, contributes to the biosynthesis of species-  
348 specific MMPs. We found that the highly similar *Bluc/Bter*FAR-A1 and *Blap*FAR-A1 orthologs  
349 exhibit distinct substrate preferences for longer fatty acyl chains (C18-C26) and shorter  
350 monounsaturated fatty acyl chains (Z9-16:1 and Z9-18:1), respectively. This substrate preference  
351 correlates with the abundance of Z9-16:1OH in *B. lapidarius* MMP and the almost complete  
352 absence of Z9-16:1OH in *B. lucorum* and *B. terrestris* (Supplementary Table 5). *Blap*FAR-A4 and  
353 to some extent *Blap*FAR-A5 likely further contribute to the biosynthesis of Z9-16:1OH in *B.*  
354 *lapidarius*. The ability of *Bluc/Bter*FAR-A1 (and not of *Blap*FAR-A1) to reduce long  
355 monounsaturated fatty acyls (Z15-20:1) also correlates with the absence of detectable amounts of  
356 Z15-20:1OH in *B. lapidarius* MMP.

357 Our comprehensive GC analysis of bumblebee male LGs, however, indicates that the  
358 composition of LG fatty acyls is another factor that contributes substantially to the final MMP  
359 composition. For example, the very low quantities of Z9-16:1OH in *B. terrestris* and *B. lucorum*

360 and of Z15-20:1OH in *B. lapidarius* can be ascribed to the absence of a FAR with the  
361 corresponding substrate specificity, but the very low amount of Z9-16:1 acyl in *B. lucorum* and *B.*  
362 *terrestris* male LG and the absence of detectable Z15-20:1 acyl in *B. lapidarius* LG also likely  
363 contribute (Supplementary Table 5).

364 We detected several fatty alcohols in FBs of *B. terrestris* and *B. lucorum*, 16:OH,  
365 Z9,Z12-18:2OH and Z9,Z12,Z15-18:3OH being the most abundant (Supplementary Table 6).  
366 Fatty alcohols are not expected to be transported from FB across haemolymph to LG<sup>29</sup>. However,  
367 the presence of Z9,Z12-18:2 and Z9,Z12,Z15-18:3 fatty alcohols in FB provides an explanation  
368 for why we did not find a FAR reducing Z9,Z12-18:2 and Z9,Z12,Z15-18:3 among the  
369 functionally characterized candidates from *B. terrestris* and *B. lucorum*. Our candidate selection  
370 criteria were based on the LG-specific FAR transcript abundance, and we might have disregarded  
371 a FAR that is capable of polyunsaturated fatty acyl reduction and is expressed at comparable  
372 levels in both LG and FB.

373 We noted several discrepancies between the FAR specificity in the yeast expression  
374 system and the apparent FAR specificity *in vivo* (i.e., the apparent specificity of fatty acyl  
375 reduction in bumblebee LG calculated from the fatty acyl and fatty alcohol content). We found  
376 that *BlapFAR-A1* is capable of producing substantial amounts of Z9-16:1OH and Z9-18:1OH  
377 (Supplementary Fig. 7b, Supplementary Fig. 8) in the yeast system, while in *B. lapidarius* LG,  
378 only Z9-16:1 acyl is converted to Z9-16:1OH, as evidenced by the absence of detectable amounts  
379 of Z9-18:1OH (Fig. 6 and Supplementary Table 5). Additionally, *BlapFAR-A1* and *BlapFAR-A4*  
380 in the yeast expression system produce polyunsaturated fatty alcohols that are not present in *B.*  
381 *lapidarius* male LG, despite the presence of corresponding fatty acyls in the LG (Supplementary  
382 Table 5). A possible explanation for the differences between FAR specificities in the bumblebee  
383 LG and the yeast expression system is that the pool of LG fatty acyls that we assessed and used to  
384 evaluate the apparent FAR specificities has a different composition than the LG pool of fatty



385 acyl-CoAs, which are the form of fatty acyls accepted by FARs as substrates. The relatively low  
386 concentrations of Z9,Z12-18:2CoA, Z9,Z12,Z15-18:3CoA, and Z9-18:1CoA in the LG of male *B.*  
387 *lapidarius* compared to the concentrations of the respective fatty acyls could prevent detectable  
388 accumulation of the corresponding fatty alcohols. We therefore propose that the selectivity of  
389 enzymes and binding proteins that convert fatty acyls to fatty acyl-CoAs<sup>66</sup> and protect fatty acyl-  
390 CoAs from hydrolysis<sup>67</sup> represents an additional mechanism shaping the species-specific fatty  
391 alcohol composition in bumblebee male LGs.

392 In sum, the functional characterization of bumblebee FARs indicates that the combined  
393 action of FARs from the expanded FAR-A orthology group has the capability to biosynthesize the  
394 majority of bumblebee MMP fatty alcohols. The substrate specificity of FARs apparently  
395 contributes to the species-specific MMP composition, but other biosynthetic steps, namely the  
396 process of fatty acyl and fatty acyl-CoA accumulation, likely also contribute to the final fatty  
397 alcohol composition of bumblebee MMPs.

398

## 399 **Conclusion**

400 In the present work, we substantially broadened our limited knowledge of the function of FARs  
401 in Hymenoptera, one of the largest insect orders. The experimentally determined reductase  
402 specificity of FARs that are abundantly expressed in bumblebee male LGs is consistent with their  
403 role in MMP biosynthesis. The majority of these MMP-biosynthetic FARs belong to the FAR-A  
404 orthology group. We found that the FAR-A group expanded in the *Bombus* and Meliponini  
405 lineage. By conducting transcriptome- and genome-scale comparative studies of a FAR gene  
406 family across Hymenoptera, assaying tissue-specific FAR gene expression, and experimentally  
407 characterizing FAR enzymatic specificities, we provide evidence that lineage-specific gene  
408 family expansion shaped the genetic basis of pheromone production in the crown group of bees.

409 Our analysis of TE distribution in the *B. terrestris* genome indicates that TEs enriched in the  
410 vicinity of FAR-A genes might have substantially contributed to the dramatic expansion of the  
411 FAR-A gene group. In the future, the increasing availability of genomic and transcriptomic  
412 resources for Hymenoptera should enable us to more precisely delineate the taxonomic extent and  
413 evolutionary timing of the massive FAR gene family expansion and assess in detail the role of  
414 TEs in the process.

415

## 416 **Methods**

### 417 **Insects**

418 Specimens of *Bombus lucorum* and *Bombus lapidarius* were obtained from laboratory colonies  
419 established from naturally overwintering bumblebee queens. The *Bombus terrestris* specimens  
420 originated from laboratory colonies obtained from a bumblebee rearing facility in Troubsko,  
421 Czech Republic.

422 LG and FB samples used for transcriptome sequencing were prepared from 3-day-old  
423 bumblebee males by pooling tissues from multiple specimens from the same colony. The cephalic  
424 part of the LG and a section of the abdominal peripheral FB were dissected, transferred  
425 immediately to TRIzol (Invitrogen), then flash-frozen at  $-80^{\circ}\text{C}$  and stored at this temperature  
426 prior to RNA isolation.

427

### 428 **RNA isolation and cDNA library construction**

429 For cloning of FARs and RT-qPCR analysis of tissue-specific gene expression, RNA was isolated  
430 from individual bumblebee tissues by guanidinium thiocyanate-phenol-chloroform extraction  
431 followed by RQ1 DNase (Promega) treatment and RNA purification using the RNeasy Mini Kit  
432 (Qiagen). The tissue sample for RNA isolation from virgin queen LGs consisted of pooled glands

433 from two specimens. For RT-qPCR analysis of age-specific expression in *B. lapidarius*, RNA  
434 was isolated using the Direct-zol RNA MicroPrep Kit (Zymo Research). A nanodrop ND-1000  
435 spectrophotometer (Thermo Fisher) was employed to determine the isolated RNA concentration.  
436 The obtained RNA was kept at  $-80^{\circ}\text{C}$  until further use.

437 The cDNA libraries of LGs from 3-day-old bumblebee males were constructed from  
438 0.50  $\mu\text{g}$  total RNA using the SMART cDNA Library Construction Kit (Clontech) with either  
439 Superscript III (Invitrogen) or M-MuLV (New England Biolabs) reverse transcriptase.

440

#### 441 **Transcriptome sequencing, assembly and annotation**

442 The transcriptomes of male LGs and FBs of *B. lucorum* and *B. terrestris* were assembled as  
443 previously described<sup>42</sup>. The male LG and FB transcriptomes of *B. lapidarius* were sequenced and  
444 assembled as described<sup>42</sup>. Briefly, total RNA was isolated from the LGs and FBs of three 3-day-  
445 old *B. lapidarius* males and pooled into a FB and LG sample. Total RNA (5  $\mu\text{g}$ ) from each of the  
446 samples was used as starting material. Random primed cDNA libraries were prepared using  
447 poly(A)<sup>+</sup> enriched mRNA and standard Illumina TrueSeq protocols (Illumina). The resulting  
448 cDNA was fragmented to an average of 150 bp. RNA-Seq was carried out by Fasteris (Fasteris)  
449 and was performed using an Illumina HiSeq 2500 Sequencing System. Quality control, including  
450 filtering high-quality reads based on the fastq score and trimming the read lengths, was carried  
451 out using CLC Genomics Workbench software v. 7.0.1 (<http://www.clcbio.com>). The complete  
452 transcriptome libraries were assembled *de novo* using CLC Genomics Workbench software. FAR  
453 expression values were calculated by mapping Illumina reads against the predicted coding  
454 regions of FAR sequences using bowtie2 v2.2.6<sup>68</sup> and counting the mapped raw reads using ht-  
455 seq v0.9.1<sup>69</sup>. The raw read counts were normalized for the FAR coding region length and the total  
456 number of reads in the sequenced library, yielding reads per kilobase of transcript per million  
457 mapped reads (RPKM) values<sup>70</sup>. A constant value of 1 was added to each RPKM value and

458 subsequently log<sub>2</sub>-transformed and visualized as heatmaps using the ggplot2 package in R.  
459 Complete short read (Illumina HiSeq2500) data for FB and LG libraries from *B. lucorum* and *B.*  
460 *lapidarius* were deposited in the Sequence Read Archive (<https://www.ncbi.nlm.nih.gov/sra>) with  
461 BioSample accession numbers SAMN08625119, SAMN08625120, SAMN08625121, and  
462 SAMN08625122 under BioProject ID PRJNA436452.

463

#### 464 **FAR sequence prediction**

465 The FARs of *B. lucorum* and *B. lapidarius* were predicted based on Blast2GO transcriptome  
466 annotation and their high protein sequence similarity to previously characterized FARs from the  
467 European honeybee *Apis mellifera*<sup>26</sup> and the silk moth *Bombyx mori*<sup>44</sup>.

468 FARs from annotated genomes or transcriptomes of other hymenopteran species (*Bombus*  
469 *impatiens*<sup>62</sup>, *Bombus terrestris*<sup>62</sup>, *Melipona quadrifasciata*<sup>71</sup>, *Apis mellifera*<sup>64</sup>, *Megachile*  
470 *rotundata*<sup>71</sup>, *Dufourea novaeangliae*, *Camponotus floridanus*<sup>72</sup>, *Acromyrmex echinator*<sup>73</sup>,  
471 *Harpegnathos saltator*<sup>72</sup>, *Nasoni vitripennis*<sup>74</sup> and *Polistes canadensis*<sup>75</sup>) were retrieved by blastp  
472 searches (*E*-value cutoff 10<sup>-5</sup>) of the species-specific NCBI RefSeq protein database or UniProt  
473 protein database using predicted protein sequences of *B. lucorum*, *B. lapidarius* and *B. terrestris*  
474 FARs (accessed February 2017). An additional round of blastp searches using FARs found in the  
475 first blastp search round did not yield any additional significant (*E*-value < 10<sup>-5</sup>) blastp hits,  
476 indicating that all FAR homologs were found in the first round of blastp searches (data not  
477 shown). For FARs with multiple predicted splice variants, only the longest protein was used for  
478 phylogenetic tree reconstruction. FARs from non-annotated transcriptomes of *Bombus rupestris*  
479 and *Tetragonula carbonaria* were retrieved via tblastn search (*E*-value cutoff 10<sup>-5</sup>) of the publicly  
480 available contig sequences (BioProject PRJNA252240 and PRJNA252285, respectively<sup>76</sup>) using  
481 *Bombus* FARs as a query. The longest translated ORFs were used as a query in tblastn searches  
482 against NCBI non-redundant nucleotide database (nr/nt) and ORFs not yielding highly-scoring

483 blast hits annotated as FARs were rejected. The final FAR proteins were used for gene tree  
484 reconstruction.

485 The active site, conserved Rossmann fold NAD(P)<sup>+</sup> binding domain (NABD)<sup>77</sup> and a  
486 putative substrate binding site in FAR coding sequences were predicted using Batch conserved  
487 domain search<sup>78</sup>. The matrix of protein identities was calculated using Clustal Omega with  
488 default parameters (<https://www.ebi.ac.uk/Tools/msa/clustalo/> accessed February 2018).

489

#### 490 **FAR gene tree reconstruction**

491 The protein sequences of predicted hymenopteran FARs were aligned using mafft v7.305. The  
492 gene tree was inferred in IQTREE v1.5.5 with 1,000 ultrafast bootstrap approximation  
493 replicates<sup>79</sup>, and with a model of amino acid substitution determined by ModelFinder<sup>80</sup>  
494 implemented in IQTREE. The tree was visualized and annotated using the ggtree package<sup>81</sup> in R  
495 programming language<sup>82</sup>.

496

#### 497 **Genome alignment and TE-enrichment analysis**

498 The genomes of *A. mellifera* and *B. terrestris* were aligned using MAUVE 2.4.0<sup>83</sup>. The genomic  
499 position of predicted *B. terrestris* FAR genes was visually inspected using the NCBI Graphical  
500 sequence viewer (accessed January 2018 at Nucleotide Entrez Database).

501 TE-enrichment analysis in the vicinity of FAR genes in the *B. terrestris* genome was  
502 carried out to explore the impact of TEs in extensive expansion of FAR-A genes. The genomic  
503 data were retrieved from the FTP server of the Bumble Bee Genome Project (accessed March  
504 2018)<sup>62</sup>. TE density around FAR genes was calculated 10 kb upstream and downstream of each  
505 FAR gene, separately for FAR-A genes and non-FAR-A genes. Statistical significances were  
506 obtained by permutation test. We compared FAR-A/non-FAR-A gene set average TE density to  
507 the null distribution of the average TE densities around *B. terrestris* genes built by 10,000

508 randomly sampling gene sets of a size corresponding to the size of the FAR-A/non-FAR-A gene  
509 set from publicly available Augustus gene predictions<sup>62</sup>. TE densities were analysed for pooled  
510 set of all TEs and separately for each TE class and major TE family (Class I: LINE, LTR, LARD;  
511 Class II: TIR, MITE, TRIM) using custom shell scripts and bedtools, a suite of Unix genomic  
512 tools<sup>84</sup>. R programming language was used for statistical analysis<sup>82</sup>.

513

#### 514 **Quantitative PCR analysis of FAR expression**

515 First-strand cDNA was synthesized from 0.30 µg total RNA using oligo(dT)<sub>12-18</sub> primers and  
516 Superscript III reverse transcriptase. The resulting cDNA samples were diluted 5-fold with water  
517 prior to RT-qPCR. The primers used for the assay (Supplementary Table 4) were designed with  
518 Primer-BLAST (<https://www.ncbi.nlm.nih.gov/tools/primer-blast/>)<sup>85</sup> and first tested for  
519 specificity by employing amplicon melting curve analysis on pooled cDNAs from each species.

520 The reaction mixtures were prepared in a total volume of 20 µL consisting of 2 µL  
521 sample and 500 nM of each primer using LightCycler 480 SYBR Green I Master kit (Roche).  
522 The reactions were run in technical duplicates for each sample. RT-qPCR was performed on a  
523 LightCycler 480 Instrument II (Roche) in 96-well plates under the following conditions: 95 °C  
524 for 60 s, then 45 cycles of 95 °C for 30 s, 55 °C for 30 s and 72 °C for 30 s followed by a final  
525 step at 72 °C for 2 min.

526 The acquired data were processed with LightCycler 480 Software 1.5 (Roche) and  
527 further analysed with MS Excel (Microsoft Corporation). FAR transcript abundances were  
528 normalized to the reference genes phospholipase A2 (PLA2) and elongation factor 1α (eEF1α) as  
529 described<sup>86</sup>.

530

#### 531 **FAR gene isolation and cloning**

532 The predicted coding regions of FARs from *B. lucorum*, *B. lapidarius* and *B. terrestris* were

533 amplified by PCR from LG cDNA libraries using gene-specific primers (Supplementary Table 4)  
534 and Phusion HF DNA polymerase (New England Biolabs). Parts of the full-length coding  
535 sequence of *BlapFAR-A5* were obtained by RACE procedure. Briefly, the PCR-amplified  
536 sequences containing the 5' and 3' ends of *BlapFAR-A5* were inserted into pCR2.1 TOPO vector  
537 using TOPO TA Cloning kit (Invitrogen) and sequenced by Sanger method. The resulting  
538 sequences overlapped with contig sequences retrieved from the *B. lapidarius* transcriptome. The  
539 full-length *BlapFAR-A5*-coding region was subsequently isolated using gene-specific PCR  
540 primers. The sequence of *BlapFAR-A1* and yeast codon-optimized sequences of *BlucFAR-*  
541 *A1-opt* and *BlucFAR-A2-opt* were obtained by custom gene synthesis (Genscript); see  
542 Supplementary Data 1 for synthetic sequences. The individual FAR coding regions were then  
543 inserted into linearized pYEXTHS-BN vector<sup>87</sup> using the following restriction sites:  
544 *Bter/BlucFAR-A1* and *BlapFAR-J* at *SphI-NotI* sites; *Bter/BlucFAR2*, *BlapFAR-A1*, *BlapFAR-*  
545 *A1-short* and *BlapFAR-A5* at *BamHI-NotI* sites; and *BlucFAR-A1-opt/FAR-A2-opt* and  
546 *BlapFAR-A4* at *BamHI-EcoRI* sites. In the case of *BterFAR-J*, the *Taq* DNA polymerase (New  
547 England Biolabs)-amplified sequence was first inserted into pCR2.1 TOPO vector and then  
548 subcloned into pYEXTHS-BN via *BamHI-EcoRI* sites using the In-Fusion HD Cloning kit  
549 (Clontech).

550 The resulting vectors containing FAR sequences *N*-terminally fused with 6×His-tag  
551 were subsequently transformed into *E. coli* DH5α cells (Invitrogen). The plasmids were isolated  
552 from bacteria with Zippy Plasmid Miniprep kit (Zymo Research) and Sanger sequenced prior to  
553 transformation into yeast. The protein-coding sequences of all studied FARs were deposited to  
554 GenBank under accession numbers MG450697–MG450704 and MG930980–MG930983.

555

## 556 **Functional assay of FARs in yeast**

557 Expression vectors carrying FAR-coding sequences were transformed into *Saccharomyces*  
558 *cerevisiae* strain BY4741 (*MATa his3ΔI leu2Δ0 met15Δ0 ura3Δ0*)<sup>88</sup> using S.c. EasyComp  
559 Transformation Kit (Invitrogen). To test FAR specificity, yeasts were cultured for 3 days in  
560 20 mL synthetic complete medium lacking uracil (SC-U) supplemented with 0.5 mM Cu<sup>2+</sup>  
561 (inducer of heterologous gene expression), 0.2% peptone and 0.1% yeast extract. The yeast  
562 cultures were then washed with water and the cell pellets lyophilized before proceeding with lipid  
563 extraction. FAR specificities were determined with the FARs acting on natural substrates present  
564 in yeast cells and with individual fatty acyls added to the cultivation media, with the respective  
565 fatty alcohols present in the LGs of studied bumblebees. Yeast cultures were supplemented with  
566 the following fatty acyls: 0.1 mM Z<sub>9</sub>,Z<sub>12</sub>-18:2COOH (linoleic acid), Z<sub>9</sub>,Z<sub>12</sub>,Z<sub>15</sub>-18:3COOH  
567 ( $\alpha$ -linolenic acid) or Z<sub>15</sub>-20:1Me solubilized with 0.05% tergitol. We chose Z<sub>15</sub>:20:1 as a  
568 representative monounsaturated C<sub>20</sub>+ fatty acyl substrate because Z<sub>15</sub>-20:1OH is the most  
569 abundant monounsaturated fatty alcohol in *B. terrestris* LG (Fig. 6 and Supplementary Table 5).

570 The level of heterologous expression of bumblebee FARs was assayed by Western blot  
571 analysis of the whole-cell extracts (obtained via sonication) using anti-6×His-tag antibody-HRP  
572 conjugate (Sigma-Aldrich) and SuperSignal West Femto Maximum Sensitivity Substrate kit  
573 (Thermo Fisher Scientific).

574

## 575 **Lipid extraction and transesterification**

576 Lipids were extracted from bumblebee tissue samples under vigorous shaking using a 1:1 mixture  
577 of CH<sub>2</sub>Cl<sub>2</sub>/MeOH, followed by addition of an equal amount of hexane and sonication. The  
578 extracts were kept at -20 °C prior to GC analysis.

579 Base-catalysed transesterification was performed as described previously<sup>89</sup> with  
580 modifications: the sample was shaken vigorously with 1.2 mL 2:1 CH<sub>2</sub>Cl<sub>2</sub>/MeOH and glass beads



581 (0.5 mm) for 1 h. After brief centrifugation to remove particulate debris, 1 mL supernatant was  
582 evaporated under nitrogen, and the residue was dissolved using 0.2 mL 0.5 M KOH in methanol.  
583 The mixture was shaken for 0.5 h and then neutralized by adding 0.2 mL Na<sub>2</sub>HPO<sub>4</sub> and KH<sub>2</sub>PO<sub>4</sub>  
584 (0.25 M each) and 35 µL 4 M HCl. The obtained FAMES were extracted with 600 µL hexanes  
585 and analysed by gas chromatography.

586 For quantification purposes, either 1-bromodecane (10:Br) or 1-bromoeicosane (20:Br)  
587 were added to the extracts as internal standards.

588

### 589 **Gas chromatography and fatty alcohol ratio determination**

590 Standards of Z<sub>9</sub>,Z<sub>12</sub>,Z<sub>15</sub>-18:3OH and Z<sub>15</sub>-20:1OH were prepared from their corresponding  
591 acids/FAMES by reduction with LiAlH<sub>4</sub>. The Z<sub>9</sub>-18:1Me standard was prepared by reacting  
592 oleoyl chloride with methanol. Other FAME and fatty alcohol standards were obtained from  
593 commercial suppliers. The FA-derived compounds in extracts were identified based on the  
594 comparison of their retention times with the standards and comparison of measured MS spectra  
595 with those from spectral libraries. Double bond positions were assigned after derivatization with  
596 dimethyl disulfide<sup>90</sup>.

597 The fatty alcohol ratio was calculated as the molar percentage of fatty alcohol relative to  
598 the total fatty alcohol and fatty acyls (e.g. free FAs, fatty acyl-CoAs, and triacylglycerols)  
599 containing the same fatty chain structure, i.e., the same chain length and double bond position.  
600 The fatty alcohol ratio represents the hypothetical degree of conversion of total fatty acyls (all the  
601 quantified fatty acyls counted as fatty acyl-CoAs) to the respective fatty alcohol and reflects the  
602 apparent FAR specificity in the investigated bumblebee tissue or yeast cell.

603

### 604 **GC-FID**

605 A flame-ionization detector was used for quantitative assessment of the FA-derived compounds.

606 The separations were performed on a Zebron ZB-5ms column (30 m × 250 μm I. D. × 0.25 μm  
607 film thickness, Phenomenex) using a 6890 gas chromatograph (Agilent Technologies) with  
608 following parameters: helium carrier gas, 250 °C injector temperature, and 1 mL.min<sup>-1</sup> column  
609 flow. The following oven temperature program was used: 100 °C (held for 1 min), ramp to  
610 285 °C at a rate of 4 °C.min<sup>-1</sup> and a second ramp to 320 °C at a rate of 20 °C.min<sup>-1</sup> with a final  
611 hold for 5 min at 320 °C. The analytes were detected in FID at 300 °C using a makeup flow of  
612 25 mL.min<sup>-1</sup> (nitrogen), hydrogen flow of 40 mL.min<sup>-1</sup>, air flow of 400 mL.min<sup>-1</sup> and acquisition  
613 rate of 5 Hz. The collected data were processed in Clarity (DataApex).

#### 614 **GC×GC-MS**

615 This approach was used to identify analytes by comparing their retention characteristics and mass  
616 spectra with those of synthetic standards. The following conditions were employed using a  
617 6890N gas chromatograph (Agilent Technologies) coupled to a Pegasus IV D time-of-flight  
618 (TOF) mass selective detector (LECO Corp.): helium carrier gas, 250 °C injector temperature,  
619 1 mL.min<sup>-1</sup> column flow, modulation time of 4 s (hot pulse time 0.8 s, cool time 1.2 s), modulator  
620 temperature offset of +20 °C (relative to secondary oven) and secondary oven temperature offset  
621 of +10 °C (relative to primary oven). Zebron ZB-5ms (30 m × 250 μm I. D. × 0.25 μm film  
622 thickness, Phenomenex) was used as a non-polar primary column and BPX-50 (1.5 m × 100 μm  
623 I. D. × 0.10 μm film thickness, SGE) was used as a more polar secondary column. The primary  
624 oven temperature program was as follows: 100 °C (1 min), then a single ramp to 320 °C at a rate  
625 of 4 °C.min<sup>-1</sup> with a final hold for 5 min at 320 °C.

626 The mass selective detector was operated in electron ionization mode (electron voltage  
627 -70 V) with a transfer line temperature of 260 °C, ion source temperature of 220 °C, 100 Hz  
628 acquisition rate, mass scan range of 30–600 u and 1800 V detector voltage. ChromaTOF software  
629 (LECO Corp.) was used to collect and analyse the data.

630

631 **Organic synthesis**

632 Methyl Z15-eicosenoate (Z15-20:1Me, **4**) was synthesized by a new and efficient four-step  
633 procedure, starting from inexpensive and easily available cyclopentadecanone. The C1–C15 part  
634 of the molecule was obtained by Baeyer-Villiger oxidation of cyclopentadecanone, followed by  
635 subsequent methanolysis of the resulting lactone **1** and Swern oxidation of the terminal alcohol  
636 group of **2**; the C16–C20 fragment was then connected to the aldehyde **3** by Wittig olefination.

637 All reactions were conducted in flame- or oven-dried glassware under an atmosphere of  
638 dry nitrogen. THF, CH<sub>2</sub>Cl<sub>2</sub> and MeOH were dried following standard methods under a nitrogen  
639 or argon atmosphere. Petroleum ether (PE, 40–65 °C boiling range) was used for  
640 chromatographic separations. TLC plates (silica gel with fluorescent indicator 254 nm, Fluka or  
641 Macherey-Nagel) were used for reaction monitoring. Flash column chromatographic separations  
642 were performed on silica gel 60 (230–400 mesh, Merck or Acros).

643 IR spectra were taken on an ALPHA spectrometer (Bruker) as neat samples using an  
644 ATR device. <sup>1</sup>H and <sup>13</sup>C NMR spectra were recorded in CDCl<sub>3</sub> on an AV III 400 HD spectrometer  
645 (Bruker) equipped with a cryo-probe or an AV III 400 spectrometer (Bruker) equipped with an  
646 inverse broad-band probe at 400 MHz for <sup>1</sup>H and 100 MHz for <sup>13</sup>C. <sup>1</sup>H NMR chemical shifts  
647 were provided in ppm using TMS as external standard; <sup>13</sup>C NMR chemical shifts were referenced  
648 against the residual solvent peak. The connectivity was determined by <sup>1</sup>H-<sup>1</sup>H COSY experiments.  
649 GC-MS (EI) measurements were performed on an Agilent 5975B MSD coupled to a 6890N gas  
650 chromatograph (Agilent Technologies). High-resolution MS (HRMS) spectra were measured on a  
651 Q-Tof micro spectrometer (resolution 100000 (ESI), Waters) or GCT Premier orthogonal  
652 acceleration TOF mass spectrometer (EI and CI, Waters).

653

654 **1-Oxacyclohexadecan-2-one (1)**

655 Cyclopentadecanone (500 mg, 2.23 mmol) was dissolved in dry CH<sub>2</sub>Cl<sub>2</sub> (6 mL) and  
656 *meta*-chloroperbenzoic acid (*m*CPBA) (687 mg, 2.79 mmol, 70%) was added at 0 °C. The  
657 reaction mixture was stirred at room temperature (r.t.), occasionally concentrated under a flow of  
658 nitrogen, and the solid residue was re-dissolved in dry CH<sub>2</sub>Cl<sub>2</sub>. After stirring for four days, the  
659 conversion was still not complete; additional *m*CPBA (164 mg, 667 μmol, 70%) was added at  
660 0 °C and stirring was continued at r.t. for 48 h. The mixture was diluted with CH<sub>2</sub>Cl<sub>2</sub> (20 mL),  
661 and the organic layer was washed with saturated NaHCO<sub>3</sub> solution (5×5 mL) and brine (5 mL).  
662 The organic layer was dried over Na<sub>2</sub>SO<sub>4</sub>, filtered and evaporated. The crude product was  
663 purified by column chromatography (50 mL silica gel, PE/CH<sub>2</sub>Cl<sub>2</sub> 1:1) providing product **1**  
664 (426 mg, 80%) as a colorless waxy solid.

665 **1**: Melting point (m.p.) <30 °C. *R*<sub>f</sub> (PE/Et<sub>2</sub>O 95:5) = 0.5. IR (film):  $\nu$  = 2925, 2855, 1733, 1459,  
666 1385, 1349, 1234, 1165, 1108, 1070, 1013, 963, 801, 720 cm<sup>-1</sup>. HRMS (+EI TOF) *m/z*:  
667 (C<sub>15</sub>H<sub>28</sub>O<sub>2</sub>) calc.: 240.2089, found: 240.2090. <sup>1</sup>H NMR (400 MHz, CDCl<sub>3</sub>)  $\delta$  = 4.13 (t,  
668 *J* = 5.7 Hz, 2H, H16), 2.33 (t, *J* = 7.0 Hz, 2H, H3), 1.72–1.56 (m, 4H, H4, H15), 1.48–1.37 (m,  
669 2H, H14), 1.36–1.23 (m, 18H, H5–H13). <sup>13</sup>C NMR (100 MHz, CDCl<sub>3</sub>)  $\delta$  = 174.2, 64.1, 34.6,  
670 28.5, 27.9, 27.28, 27.26, 27.1, 26.8, 26.5, 26.2, 26.1, 26.0, 25.3, 25.1.

#### 671 **Methyl 15-hydroxypentadecanoate (2)**

672 MeOK (74 μL, 208 μmol, 2.81M in MeOH) was added dropwise at 0° C to a mixture of lactone **1**  
673 (50 mg, 208 μmol), dry THF (0.5 mL) and MeOH (1 mL). The mixture was stirred at r.t. for 48 h,  
674 by which point the reaction was complete as indicated by TLC. The solution was quenched with a  
675 few drops of water and diluted with Et<sub>2</sub>O (5 mL). After stirring for 30 min, the layers were  
676 separated and the aqueous layer was extracted with Et<sub>2</sub>O (3×3 mL). The combined organic layers  
677 were washed with brine and water, dried over Na<sub>2</sub>SO<sub>4</sub>, filtered and evaporated to obtain nearly  
678 pure product. Purification by column chromatography (5 mL silica gel, PE/EtOAc 9:1) provided

679 product **2** (55 mg, 97%) as a colorless solid.

680 **2**: m.p. 47–48 °C.  $R_f$  (PE/Et<sub>2</sub>O 95:5) = 0.2. IR (film):  $\nu$  = 3285, 2917, 2849, 1740, 1473, 1463,  
681 1435, 1412, 1382, 1313, 1286, 1264, 1240, 1217, 1196, 1175, 1117, 1071, 1061, 1049, 1025,  
682 1013, 992, 973, 926, 884, 731, 720, 701 cm<sup>-1</sup>. HRMS (+ESI)  $m/z$ : (C<sub>16</sub>H<sub>32</sub>O<sub>3</sub>Na) calc.: 295.2244,  
683 found: 295.2245. <sup>1</sup>H NMR (400 MHz, CDCl<sub>3</sub>)  $\delta$  = 3.64 (s, 3H, OCH<sub>3</sub>), 3.61 (t,  $J$  = 6.7 Hz, 2H,  
684 H15), 2.28 (t,  $J$  = 7.5 Hz, 2H, H2), 1.72 (s, 1H, OH), 1.59 (quint,  $J$  = 7.1 Hz, 2H, H3), 1.54  
685 (quint,  $J$  = 7.1 Hz, 2H, H14), 1.37–1.14 (m, 20H, H4–H13). <sup>13</sup>C NMR (101 MHz, CDCl<sub>3</sub>)  
686  $\delta$  = 174.5, 63.1, 51.6, 34.2, 32.9, 29.71 (3C), 29.68 (2C), 29.5 (2C), 29.4, 29.3, 25.9, 25.1.

### 687 **Methyl 15-oxopentadecanoate (3)**

688 Dry DMSO (110  $\mu$ L, 1.54 mmol) was added at –78 °C dropwise to a mixture of oxalyl chloride  
689 (90  $\mu$ L, 1.03 mmol) and CH<sub>2</sub>Cl<sub>2</sub> (2 mL) in a 25 mL flask, and the reaction mixture was stirred for  
690 15 min. The hydroxy ester **2** (140 mg, 0.51 mmol) in dry CH<sub>2</sub>Cl<sub>2</sub> (2 mL) was added dropwise via  
691 a cannula; the white, turbid reaction mixture was stirred for 40 min, and dry triethylamine  
692 (432  $\mu$ L, 3.08 mmol) was added dropwise. The mixture was stirred at –78 °C for 1 h and warmed  
693 to 0 °C over 30 min at which point the reaction was complete according to TLC. The reaction  
694 mixture was diluted with CH<sub>2</sub>Cl<sub>2</sub> (10 mL), quenched with saturated NH<sub>4</sub>Cl solution (5 mL) and  
695 water (5 mL), and warmed to r.t. The layers were separated and the aqueous layer was extracted  
696 with CH<sub>2</sub>Cl<sub>2</sub> (3 $\times$ 10 mL). The combined organic layers were washed with brine, dried over  
697 MgSO<sub>4</sub>, filtered and evaporated. The crude product was purified by flash chromatography (10 mL  
698 silica gel, PE/EtOAc 95:5) giving aldehyde **3** (109 mg, 78%) as a colorless waxy solid.

699 **3**: m.p. <37 °C.  $R_f$  (PE/EtOAc 9:1) = 0.4. IR (film):  $\nu$  = 2923, 2852, 2752, 1738, 1465, 1436,  
700 1362, 1315, 1243, 1197, 1172, 1120, 1017, 985, 958, 883, 811, 719 cm<sup>-1</sup>. HRMS (+CI TOF)  $m/z$ :  
701 (C<sub>16</sub>H<sub>31</sub>O<sub>3</sub>) calc.: 271.2273, found: 271.2277. <sup>1</sup>H NMR (400 MHz, CDCl<sub>3</sub>)  $\delta$  = 9.76 (t,  
702  $J$  = 1.9 Hz, 1H, H15), 3.66 (s, 3H, OCH<sub>3</sub>), 2.41 (td,  $J$  = 7.4, 1.9 Hz, 2H, H14), 2.29 (t,  $J$  = 7.5 Hz,

703 2H, H2), 1.67–1.56 (m, 4H, H3,H13), 1.35–1.20 (m, 18H, H4-H12). <sup>13</sup>C NMR (100 MHz,  
704 CDCl<sub>3</sub>) δ = 203.1, 174.5, 51.6, 44.1, 34.3, 29.72, 29.70 (2C), 29.58, 29.56, 29.5, 29.4, 29.31,  
705 29.29, 25.1, 22.2.

706 **Methyl Z15-eicosenoate (4, Z15-20:1Me)**

707 NaHMDS (614 μL, 0.614 mmol, 1.0 M in THF) was added dropwise at –55 °C over 10 min to a  
708 suspension of high vacuum-dried (pentyl)triphenylphosphonium bromide (282 mg, 0.68 mmol)<sup>91</sup>  
709 in dry THF (3 mL) in a flame dried round-bottomed Schlenk flask. The bright orange reaction  
710 mixture was stirred while warming to –40 °C for 50 min, and a solution of aldehyde **3** (92 mg,  
711 0.34 mmol) in dry THF (1.5 mL) was added dropwise via cannula at –45 °C. Stirring was  
712 continued for 1 h, and the reaction mixture was warmed to r.t. over 90 min. The reaction mixture  
713 was diluted with PE (25 mL); filtered through a short silica gel plug, which was washed with PE;  
714 and evaporated. The crude product was purified by flash chromatography (silica gel, gradient  
715 PE/EtOAc 100:0 to 95:5) to give methyl ester **4** (88 mg, 79%) as a colorless oil.

716 **4**: *R*<sub>f</sub>(PE/Et<sub>2</sub>O 95:5) = 0.6. IR (film): ν = 3005, 2922, 2853, 1743, 1699, 1684, 1653, 1541, 1521,  
717 1507, 1489, 1436, 1362, 1196, 1169, 1106, 1017, 880, 722 cm<sup>-1</sup>. GC-MS (EI) *t*<sub>R</sub> [60 °C  
718 (4 min) → 10 °C/min to 320 °C (10 min)] 21 min; *m/z* (%): 324 (4) [M<sup>+</sup>], 292 (26), 250 (10), 208  
719 (9), 152 (7), 123 (12), 111 (22), 97 (48), 87 (40), 83 (52), 74 (56), 69 (70), 59 (14), 55 (100), 41  
720 (43), 28 (26). HRMS (+EI TOF) *m/z*: (C<sub>21</sub>H<sub>40</sub>O<sub>2</sub>) calc.: 324.3028, found: 324.3026. <sup>1</sup>H NMR  
721 (401 MHz, CDCl<sub>3</sub>) δ = 5.39–5.30 (m, 2H, H15,H16), 3.66 (s, 3H, OCH<sub>3</sub>), 2.30 (t, *J* = 7.5 Hz, 2H,  
722 H2), 2.07–1.96 (m, 4H, H14,H17), 1.61 (quint, *J* = 7.5 Hz, 2H, H3), 1.37–1.14 (m, 24H, H4-  
723 H13,H18,H19), 0.89 (t, *J* = 7.2 Hz, 3H, H20). <sup>13</sup>C NMR (100 MHz, CDCl<sub>3</sub>) δ = 174.5, 130.1,  
724 130.0, 51.6, 34.3, 32.1, 29.9, 29.81, 29.79, 29.74, 29.70, 29.68, 29.6, 29.5, 29.4, 29.3, 27.4, 27.1,  
725 25.1, 22.5, 14.2.

726

## 727 **Statistical analysis**

728 All lipid quantifications in yeast and LGs and FBs of bumblebees and transcript quantifications in  
729 bumblebee tissues were performed using three biological replicates (in addition, technical  
730 duplicates were used for RT-qPCR). The results are reported as mean value  $\pm$  S.D. Significant  
731 differences were determined by one-way analysis of variance (ANOVA) followed by post-hoc  
732 Tukey's honestly significant difference (HSD) test or by a two-tailed *t*-test as indicated in the  
733 Results section.

734

## 735 **Acknowledgements**

736 This work was supported by the Czech Science Foundation (grant no. 15-06569S) and by the  
737 Ministry of Education of the Czech Republic (project n. LO1302). We thank Dr. Stefan Jarau for  
738 stimulating discussions. Computational resources were provided by the CESNET LM2015042  
739 and the CERIT Scientific Cloud LM2015085, provided under the program "Projects of Large  
740 Research, Development, and Innovations Infrastructures" and by the Okinawa Institute of  
741 Science and Technology.

742

## 743 **References**

- 744 1. Koonin, E. V. Orthologs, Paralogs, and Evolutionary Genomics. *Annu. Rev. Genet.* **39**, 309–338 (2005).
- 745 2. Lespinet, O. The Role of Lineage-Specific Gene Family Expansion in the Evolution of Eukaryotes. *Genome*  
746 *Res.* **12**, 1048–1059 (2002).
- 747 3. Demuth, J. P., Bie, T. De, Stajich, J. E., Cristianini, N. & Hahn, M. W. The Evolution of Mammalian Gene  
748 Families. *PLoS One* **1**, e85 (2006).
- 749 4. Rispe, C. *et al.* Large Gene Family Expansion and Variable Selective Pressures for Cathepsin B in Aphids.  
750 *Mol. Biol. Evol.* **25**, 5–17 (2007).
- 751 5. Cortesi, F. *et al.* Ancestral duplications and highly dynamic opsin gene evolution in percomorph fishes. *Proc.*  
752 *Natl. Acad. Sci.* **112**, 1493–1498 (2015).

- 753 6. Niimura, Y. & Nei, M. Evolutionary dynamics of olfactory and other chemosensory receptor genes in  
754 vertebrates. *J. Hum. Genet.* **51**, 505–517 (2006).
- 755 7. Ohno, S. *Evolution by Gene Duplication*. (1970).
- 756 8. Zhang, J. Evolution by gene duplication: an update. *Trends Ecol. Evol.* **18**, 292–298 (2003).
- 757 9. Lynch, M. The Evolutionary Fate and Consequences of Duplicate Genes. *Science (80-. )*. **290**, 1151–1155  
758 (2000).
- 759 10. Innan, H. & Kondrashov, F. The evolution of gene duplications: classifying and distinguishing between  
760 models. *Nat. Rev. Genet.* **11**, 97–108 (2010).
- 761 11. Eirín-López, J. M., Rebordinos, L., Rooney, A. P. & Rozas, J. The Birth-and-Death Evolution of Multigene  
762 Families Revisited. **7**, 170–196 (2012).
- 763 12. Wang, M. *et al.* Five Fatty Acyl-Coenzyme A Reductases Are Involved in the Biosynthesis of Primary  
764 Alcohols in *Aegilops tauschii* Leaves. *Front. Plant Sci.* **8**, (2017).
- 765 13. Cheng, J. B. & Russell, D. W. Mammalian wax biosynthesis. I. Identification of two fatty acyl-Coenzyme A  
766 reductases with different substrate specificities and tissue distributions. *J. Biol. Chem.* **279**, 37789–97 (2004).
- 767 14. Jaspers, M. H. J. *et al.* The fatty acyl-CoA reductase Waterproof mediates airway clearance in *Drosophila*.  
768 *Dev. Biol.* **385**, 23–31 (2014).
- 769 15. Metz, J. G., Pollard, M. R., Anderson, L., Hayes, T. R. & Lassner, M. W. Purification of a jojoba embryo  
770 fatty acyl-coenzyme A reductase and expression of its cDNA in high erucic acid rapeseed. *Plant Physiol.*  
771 **122**, 635–44 (2000).
- 772 16. Teerawanichpan, P. & Qiu, X. Fatty acyl-CoA reductase and wax synthase from *Euglena gracilis* in the  
773 biosynthesis of medium-chain wax esters. *Lipids* **45**, 263–73 (2010).
- 774 17. Teerawanichpan, P. & Qiu, X. Molecular and functional analysis of three fatty acyl-CoA reductases with  
775 distinct substrate specificities in copepod *Calanus finmarchicus*. *Mar. Biotechnol. (NY)*. **14**, 227–36 (2012).
- 776 18. Nagan, N. & Zoeller, R. A. Plasmalogens: biosynthesis and functions. *Prog. Lipid Res.* **40**, 199–229 (2001).
- 777 19. Lassance, J.-M. *et al.* Functional consequences of sequence variation in the pheromone biosynthetic gene  
778 pgFAR for *Ostrinia* moths. *Proc. Natl. Acad. Sci. U. S. A.* **110**, 3967–72 (2013).
- 779 20. Lassance, J.-M. *et al.* Allelic variation in a fatty-acyl reductase gene causes divergence in moth sex  
780 pheromones. *Nature* **466**, 486–9 (2010).
- 781 21. Smadja, C. & Butlin, R. K. On the scent of speciation: the chemosensory system and its role in premating



- 782 isolation. *Heredity (Edinb)*. **102**, 77–97 (2009).
- 783 22. Liénard, M. A., Hagström, A. K., Lassance, J.-M. & Löfstedt, C. Evolution of multicomponent pheromone  
784 signals in small ermine moths involves a single fatty-acyl reductase gene. *Proc. Natl. Acad. Sci. U. S. A.* **107**,  
785 10955–60 (2010).
- 786 23. Liénard, M. A., Wang, H.-L., Lassance, J.-M. & Löfstedt, C. Sex pheromone biosynthetic pathways are  
787 conserved between moths and the butterfly *Bicyclus anynana*. *Nat. Commun.* **5**, (2014).
- 788 24. Antony, B. *et al.* Pheromone-gland-specific fatty-acyl reductase in the adzuki bean borer, *Ostrinia scapularis*  
789 (Lepidoptera: Crambidae). *Insect Biochem. Mol. Biol.* **39**, 90–95 (2009).
- 790 25. Tupec, M., Buček, A., Valterová, I. & Pichová, I. Biotechnological potential of insect fatty acid-modifying  
791 enzymes. *Zeitschrift für Naturforsch. C* **72**, 387–403 (2017).
- 792 26. Teerawanichpan, P., Robertson, A. J. & Qiu, X. A fatty acyl-CoA reductase highly expressed in the head of  
793 honey bee (*Apis mellifera*) involves biosynthesis of a wide range of aliphatic fatty alcohols. *Insect Biochem.*  
794 *Mol. Biol.* **40**, 641–9 (2010).
- 795 27. Hu, Y.-H., Chen, X.-M., Yang, P. & Ding, W.-F. Characterization and functional assay of a fatty acyl-CoA  
796 reductase gene in the scale insect, *Ericerus pela* Chavannes (Hemiptera: Coccoidae). *Arch. Insect Biochem.*  
797 *Physiol.* **97**, e21445 (2018).
- 798 28. Ayasse, M. & Jarau, S. Chemical ecology of bumble bees. *Annu. Rev. Entomol.* **59**, 299–319 (2014).
- 799 29. Buček, A. *et al.* Exploring complex pheromone biosynthetic processes in the bumblebee male labial gland by  
800 RNA sequencing. *Insect Mol. Biol.* **25**, 295–314 (2016).
- 801 30. Goulson, D. *Bumblebees - behaviour, ecology and conservation*. (Oxford University Press, Oxford, 2010).
- 802 31. Bertsch, A., Schweer, H., Titze, A. & Tanaka, H. Male labial gland secretions and mitochondrial DNA  
803 markers support species status of *Bombus cryptarum* and *B. magnus* (Hymenoptera, Apidae). *Insectes Soc.*  
804 **52**, 45–54 (2005).
- 805 32. Rasmont, P. *et al.* Cephalic secretions of the bumblebee subgenus *Sibiricobombus* Vogt suggest *Bombus*  
806 *niveatus* Kriechbaumer and *Bombus vorticosus* Gerstaecker are conspecific (Hymenoptera, Apidae, *Bombus*  
807 ). *Apidologie* **36**, 571–584 (2005).
- 808 33. Coppée, A., Terzo, M., Valterová, I. & Rasmont, P. Intraspecific Variation of the Cephalic Labial Gland  
809 Secretions in *Bombus terrestris* (L.) (Hymenoptera: Apidae). *Chem. Biodivers.* **5**, 2654–2661 (2008).
- 810 34. Bergström, G., Kullberg, B. J. & Ställberg-Stenhagen, S. Studies on natural odoriferous compounds: VII.

- 811 Recognition of two forms of *Bombus lucorum* L. (Hymenoptera, Apidae) by analysis of the volatile marking  
812 secretion from individual males. *Zoon* **1**, 31–42 (1973).
- 813 35. Kullenberg, B., Bergstrom, G., Bringer, B., Carlberg, B. & Cederberg, B. Observations on scent marking by  
814 *Bombus* Latr. and *Psithyrus* Lep. males (Hym. Apidae) and localization of site of production of the secretion.  
815 *Zoon* **1**, 23–30 (1973).
- 816 36. Kullenberg, B., Bergström, G. & Ställberg-Stenhagen, S. Volatile components of the cephalic marking  
817 secretion of male bumble bees. *Acta Chem. Scand.* **24**, 1481–5 (1970).
- 818 37. Urbanová, K., Valterová, I., Hovorka, O. & Kindl, J. Chemotaxonomical characterisation of males *Bombus*  
819 *lucorum* (Hymenoptera: Apidae) collected in Czech republic. *Eur. J. Entomol.* **127**, 111–115 (2001).
- 820 38. Šobotník, J. *et al.* Age-dependent changes in structure and function of the male labial gland in *Bombus*  
821 *terrestris*. *J. Insect Physiol.* **54**, 204–14 (2008).
- 822 39. Luxová, A., Valterová, I., Stránský, K., Hovorka, O. & Svatoš, A. Biosynthetic studies on marking  
823 pheromones of bumblebee males. *Chemoecology* **87**, 81–87 (2003).
- 824 40. Žáček, P. *et al.* Comparison of age-dependent quantitative changes in the male labial gland secretion of  
825 *Bombus terrestris* and *Bombus lucorum*. *J. Chem. Ecol.* **35**, 698–705 (2009).
- 826 41. Tillman, J. a, Seybold, S. J., Jurenka, R. a & Blomquist, G. J. Insect pheromones--an overview of  
827 biosynthesis and endocrine regulation. *Insect Biochem. Mol. Biol.* **29**, 481–514 (1999).
- 828 42. Buček, A. *et al.* The role of desaturases in the biosynthesis of marking pheromones in bumblebee males.  
829 *Insect Biochem. Mol. Biol.* **43**, 724–731 (2013).
- 830 43. Žáček, P. *et al.* Biosynthetic studies of the male marking pheromone in bumblebees by using labelled fatty  
831 acids and two-dimensional gas chromatography with mass detection. *Chempluschem* **80**, 839–850 (2015).
- 832 44. Moto, K. *et al.* Pheromone gland-specific fatty-acyl reductase of the silkworm, *Bombyx mori*. *Proc. Natl.*  
833 *Acad. Sci. U. S. A.* **100**, 9156–61 (2003).
- 834 45. Stolle, E. *et al.* A second generation genetic map of the bumblebee *Bombus terrestris* (Linnaeus, 1758)  
835 reveals slow genome and chromosome evolution in the Apidae. *BMC Genomics* **12**, 48 (2011).
- 836 46. Angov, E. Codon usage: Nature's roadmap to expression and folding of proteins. *Biotechnol. J.* **6**, 650–659  
837 (2011).
- 838 47. Jordan, I. K., Makarova, K. S., Spouge, J. L., Wolf, Y. I. & Koonin, E. V. Lineage-specific gene expansions  
839 in bacterial and archaeal genomes. *Genome Res.* **11**, 555–65 (2001).

- 840 48. Radivojac, P. *et al.* A large-scale evaluation of computational protein function prediction. *Nat. Methods* **10**,  
841 221–227 (2013).
- 842 49. Elsik, C. G. *et al.* Hymenoptera Genome Database: integrating genome annotations in HymenopteraMine.  
843 *Nucleic Acids Res.* **44**, D793–D800 (2016).
- 844 50. Johnson, B. R. *et al.* Phylogenomics Resolves Evolutionary Relationships among Ants, Bees, and Wasps.  
845 *Curr. Biol.* **23**, 2058–2062 (2013).
- 846 51. Mao, M., Gibson, T. & Dowton, M. Higher-level phylogeny of the Hymenoptera inferred from mitochondrial  
847 genomes. *Mol. Phylogenet. Evol.* **84**, 34–43 (2015).
- 848 52. Ramírez, S. R. *et al.* A molecular phylogeny of the stingless bee genus *Melipona* (Hymenoptera: Apidae).  
849 *Mol. Phylogenet. Evol.* **56**, 519–525 (2010).
- 850 53. Pils, B. & Schultz, J. Inactive Enzyme-homologues Find New Function in Regulatory Processes. *J. Mol.*  
851 *Biol.* **340**, 399–404 (2004).
- 852 54. Hines, H. M. Historical biogeography, divergence times, and diversification patterns of bumble bees  
853 (Hymenoptera : Apidae : *Bombus*). *Syst. Biol.* **57**, 58–75 (2008).
- 854 55. Jarau, S., Hrncir, M., Zucchi, R. & Barth, F. G. A stingless bee uses labial gland secretions for scent trail  
855 communication ( *Trigona recursa* Smith 1863). *J. Comp. Physiol. A Sensory, Neural, Behav. Physiol.* **190**,  
856 233–239 (2004).
- 857 56. Jarau, S. *et al.* Hexyl Decanoate, the First Trail Pheromone Compound Identified in a Stingless Bee, *Trigona*  
858 *recursa*. *J. Chem. Ecol.* **32**, 1555–1564 (2006).
- 859 57. Jarau, S. *et al.* The Trail Pheromone of a Stingless Bee, *Trigona corvina* (Hymenoptera, Apidae, Meliponini),  
860 Varies between Populations. *Chem. Senses* **35**, 593–601 (2010).
- 861 58. Tumlinson, J. H. *et al.* Identification of a pheromone blend attractive to *Manduca sexta* (L.) males in a wind  
862 tunnel. *Arch. Insect Biochem. Physiol.* **10**, 255–271 (1989).
- 863 59. Janoušek, V., Laukaitis, C. M., Yanchukov, A. & Karn, R. C. The Role of Retrotransposons in Gene Family  
864 Expansions in the Human and Mouse Genomes. *Genome Biol. Evol.* **8**, 2632–2650 (2016).
- 865 60. Deininger, P. L., Moran, J. V, Batzer, M. A. & Kazazian, H. H. Mobile elements and mammalian genome  
866 evolution. *Curr. Opin. Genet. Dev.* **13**, 651–658 (2003).
- 867 61. Reams, A. B. & Roth, J. R. Mechanisms of Gene Duplication and Amplification. *Cold Spring Harb.*  
868 *Perspect. Biol.* **7**, a016592 (2015).

- 869 62. Sadd, B. M. *et al.* The genomes of two key bumblebee species with primitive eusocial organization. *Genome*  
870 *Biol.* **16**, 76 (2015).
- 871 63. Elsik, C. G. *et al.* Finding the missing honey bee genes: lessons learned from a genome upgrade. *BMC*  
872 *Genomics* **15**, 86 (2014).
- 873 64. Weinstock, G. M. *et al.* Insights into social insects from the genome of the honeybee *Apis mellifera*. *Nature*  
874 **443**, 931–949 (2006).
- 875 65. Amsalem, E., Kiefer, J., Schulz, S. & Hefetz, A. The effect of caste and reproductive state on the chemistry  
876 of the cephalic labial glands secretion of *bombus terrestris*. *J. Chem. Ecol.* **40**, 900–12 (2014).
- 877 66. Oba, Y., Ojika, M. & Inouye, S. Characterization of CG6178 gene product with high sequence similarity to  
878 firefly luciferase in *Drosophila melanogaster*. *Gene* **329**, 137–145 (2004).
- 879 67. Matsumoto, S. *et al.* Characterization of acyl-CoA-binding protein (ACBP) in the pheromone gland of the  
880 silkworm, *Bombyx mori*. *Insect Biochem. Mol. Biol.* **31**, 603–9 (2001).
- 881 68. Langmead, B. & Salzberg, S. L. Fast gapped-read alignment with Bowtie 2. *Nat. Methods* **9**, 357–359  
882 (2012).
- 883 69. Anders, S., Pyl, P. T. & Huber, W. HTSeq--a Python framework to work with high-throughput sequencing  
884 data. *Bioinformatics* **31**, 166–169 (2015).
- 885 70. Mortazavi, A., Williams, B. A., McCue, K., Schaeffer, L. & Wold, B. Mapping and quantifying mammalian  
886 transcriptomes by RNA-Seq. *Nat. Methods* **5**, 621–8 (2008).
- 887 71. Woodard, S. H. *et al.* Genes involved in convergent evolution of eusociality in bees. *Proc. Natl. Acad. Sci. U.*  
888 *S. A.* **108**, 7472–7477 (2011).
- 889 72. Bonasio, R. *et al.* Genomic Comparison of the Ants *Camponotus floridanus* and *Harpegnathos saltator*.  
890 *Science (80-. )*. **329**, 1068–1071 (2010).
- 891 73. Nygaard, S. *et al.* The genome of the leaf-cutting ant *Acromyrmex echinatior* suggests key adaptations to  
892 advanced social life and fungus farming. *Genome Res.* **21**, 1339–1348 (2011).
- 893 74. Werren, J. H. *et al.* Functional and Evolutionary Insights from the Genomes of Three Parasitoid *Nasonia*  
894 *Species*. *Science (80-. )*. **327**, 343–348 (2010).
- 895 75. Patalano, S. *et al.* Molecular signatures of plastic phenotypes in two eusocial insect species with simple  
896 societies. *Proc. Natl. Acad. Sci.* **112**, 13970–13975 (2015).
- 897 76. Peters, R. S. *et al.* Evolutionary History of the Hymenoptera. *Curr. Biol.* **27**, 1013–1018 (2017).

- 898 77. Rossmann, M. G., Moras, D. & Olsen, K. W. Chemical and biological evolution of a nucleotide-binding  
899 protein. *Nature* **250**, 194–199 (1974).
- 900 78. Marchler-Bauer, A. *et al.* CDD: NCBI’s conserved domain database. *Nucleic Acids Res.* **43**, D222–D226  
901 (2015).
- 902 79. Minh, B. Q., Nguyen, M. A. T. & von Haeseler, A. Ultrafast Approximation for Phylogenetic Bootstrap. *Mol.*  
903 *Biol. Evol.* **30**, 1188–1195 (2013).
- 904 80. Kalyaanamoorthy, S., Minh, B. Q., Wong, T. K. F., von Haeseler, A. & Jermin, L. S. ModelFinder: fast  
905 model selection for accurate phylogenetic estimates. *Nat. Methods* **14**, 587–589 (2017).
- 906 81. Yu, G., Smith, D. K., Zhu, H., Guan, Y. & Lam, T. T.-Y. `ggtree`: an `r` package for  
907 visualization and annotation of phylogenetic trees with their covariates and other associated data. *Methods*  
908 *Ecol. Evol.* (2016). doi:10.1111/2041-210X.12628
- 909 82. R Core Team. R: A language and environment for statistical computing. (2016).
- 910 83. Darling, A. C. E. Mauve: Multiple Alignment of Conserved Genomic Sequence With Rearrangements.  
911 *Genome Res.* **14**, 1394–1403 (2004).
- 912 84. Quinlan, A. R. & Hall, I. M. BEDTools: a flexible suite of utilities for comparing genomic features.  
913 *Bioinformatics* **26**, 841–842 (2010).
- 914 85. Ye, J. *et al.* Primer-BLAST: A tool to design target-specific primers for polymerase chain reaction. *BMC*  
915 *Bioinformatics* **13**, 134 (2012).
- 916 86. Horňáková, D., Matoušková, P., Kindl, J., Valterová, I. & Pichová, I. Selection of reference genes for real-  
917 time polymerase chain reaction analysis in tissues from *Bombus terrestris* and *Bombus lucorum* of different  
918 ages. *Anal. Biochem.* **397**, 118–20 (2010).
- 919 87. Holz, C., Hesse, O., Bolotina, N., Stahl, U. & Lang, C. A micro-scale process for high-throughput expression  
920 of cDNAs in the yeast *Saccharomyces cerevisiae*. *Protein Expr. Purif.* **25**, 372–8 (2002).
- 921 88. Baker Brachmann, C. *et al.* Designer deletion strains derived from *Saccharomyces cerevisiae* S288C: A useful  
922 set of strains and plasmids for PCR-mediated gene disruption and other applications. *Yeast* **14**, 115–132  
923 (1998).
- 924 89. Matoušková, P. *et al.* A delta9 desaturase from *Bombus lucorum* males: investigation of the biosynthetic  
925 pathway of marking pheromones. *Chembiochem* **9**, 2534–41 (2008).
- 926 90. Carlson, D. A., Roan, C. S., Yost, R. A. & Hector, J. Dimethyl Disulfide Derivatives of Long-Chain Alkenes,

- 927 Alkadienes, and Alkatrienes for Gas-Chromatography Mass-Spectrometry. *Anal. Chem.* **61**, 1564–1571  
928 (1989).
- 929 91. Prasad, V. P. *et al.* Synthesis of fluorinated analogues of sphingosine-1-phosphate antagonists as potential  
930 radiotracers for molecular imaging using positron emission tomography. *Bioorg. Med. Chem.* **22**, 5168–5181  
931 (2014).
- 932
- 933
- 934

935 **Figures, tables**

936

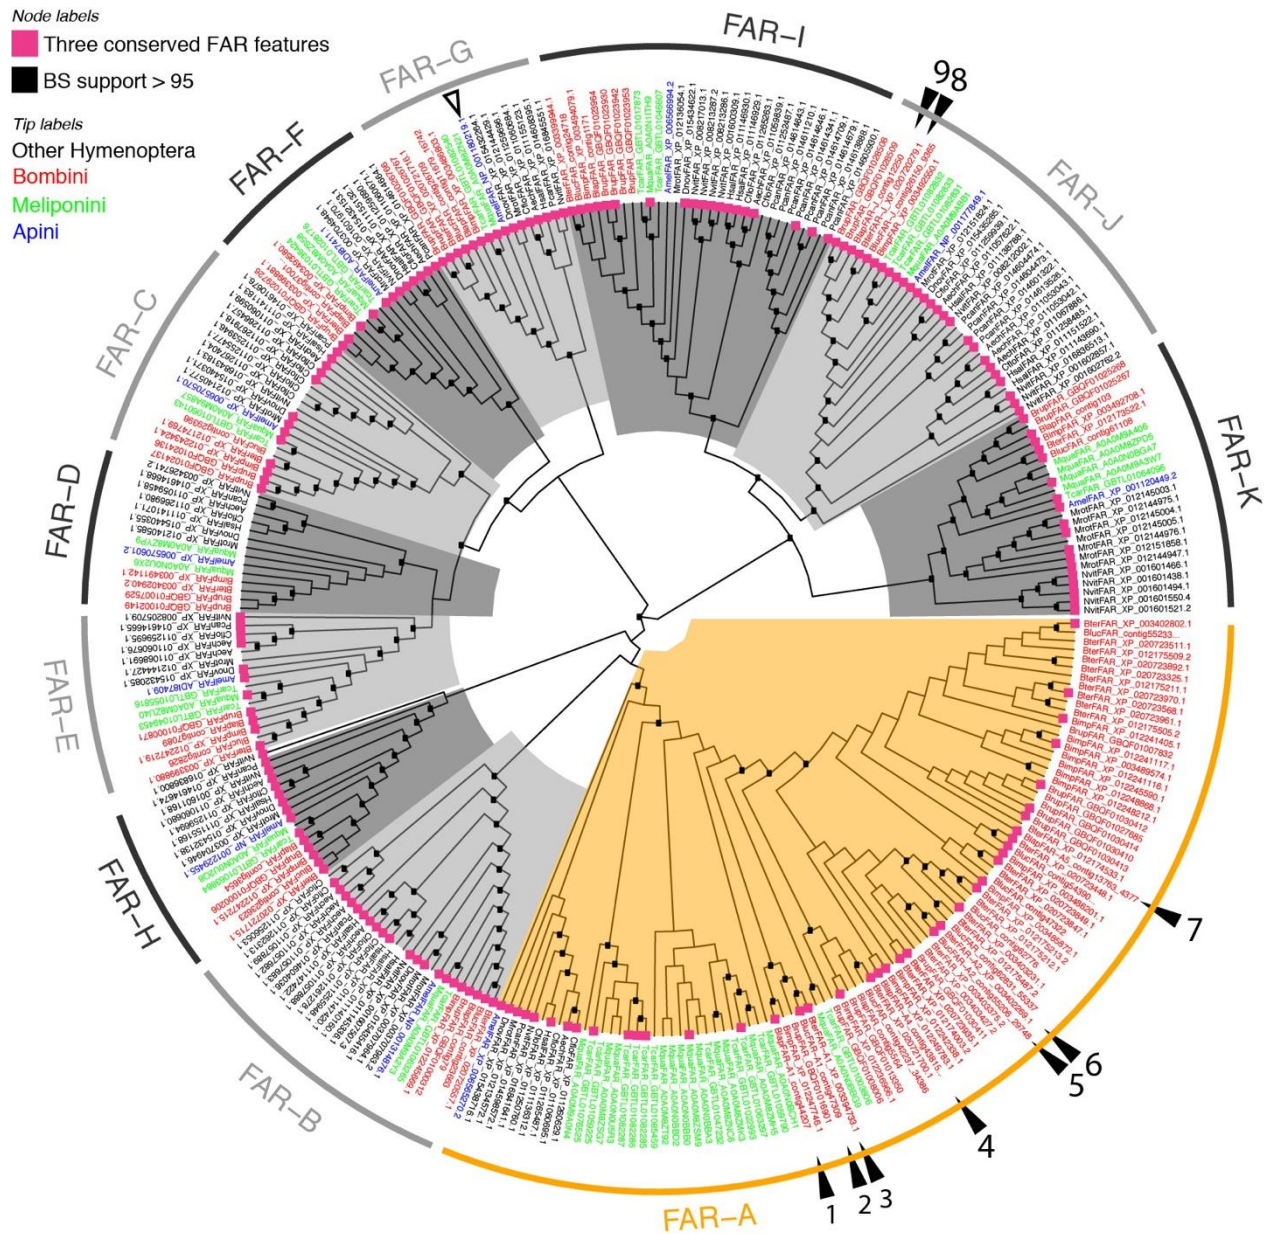

937

938 **Figure 1.** Hymenopteran FAR gene tree. Tree tips are coloured according to taxonomy: red,  
939 bumblebee FARs (*B. terrestris*, *B. lucorum*, *B. lapidarius*, *B. impatiens*, *B. rupestris*); green,  
940 stingless bee FARs (*Tetragonula carbonaria*, *Melipona quadrifasciata*); blue, *A. mellifera* FARs;  
941 and black, FARs from other hymenopteran species. The FAR-A orthology group is highlighted  
942 orange; other orthology groups in shades of grey. Functionally characterized bumblebee FARs

943 from this study are indicated by filled triangles and numbered.1: *Blap*FAR-A1, 2: *Bluc*FAR-A1,  
944 3: *Bter*FAR-A1, 4: *Blap*FAR-A4, 5: *Bluc*FAR-A2, 6: *Bter*FAR-A2, 7: *Blap*FAR-A5, 8: *Bter*FAR-  
945 J, and 9: *Blap*FAR-J. The functionally characterized *A. mellifera* FAR is indicated by an empty  
946 triangle. Internal nodes highlighted with black boxes indicate bootstrap support >95%. Violet  
947 squares at the tree tips indicate FARs for which CDD search yielded all three FAR conserved  
948 features—active site, putative NAD(P)<sup>+</sup> binding site and substrate binding site (see Table S1 for  
949 complete CDD search results).

950

951



952

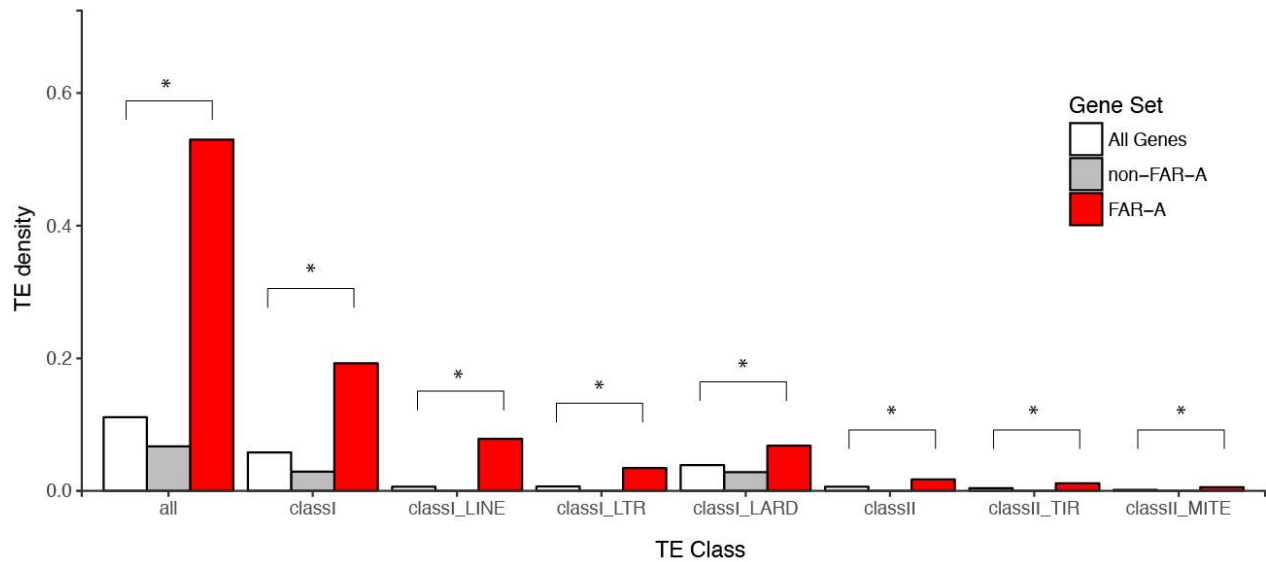

953

954 **Figure 2.** Average TE densities in 10 kb windows around groups of *B. terrestris* genes. “All  
955 Genes” represents randomly selected sets of *B. terrestris* genes, and non-FAR-A includes FAR  
956 genes belonging to the non-FAR-A orthology groups. Densities were analyzed for all TEs (all  
957 and separately for Class I, Class II and the most abundant TE families within each class (LINES,  
958 LTRs, LARDs, TIRs, MITEs). Significant differences ( $p < 0.05$ , two-tailed *t*-test) are marked  
959 with asterisks.

960

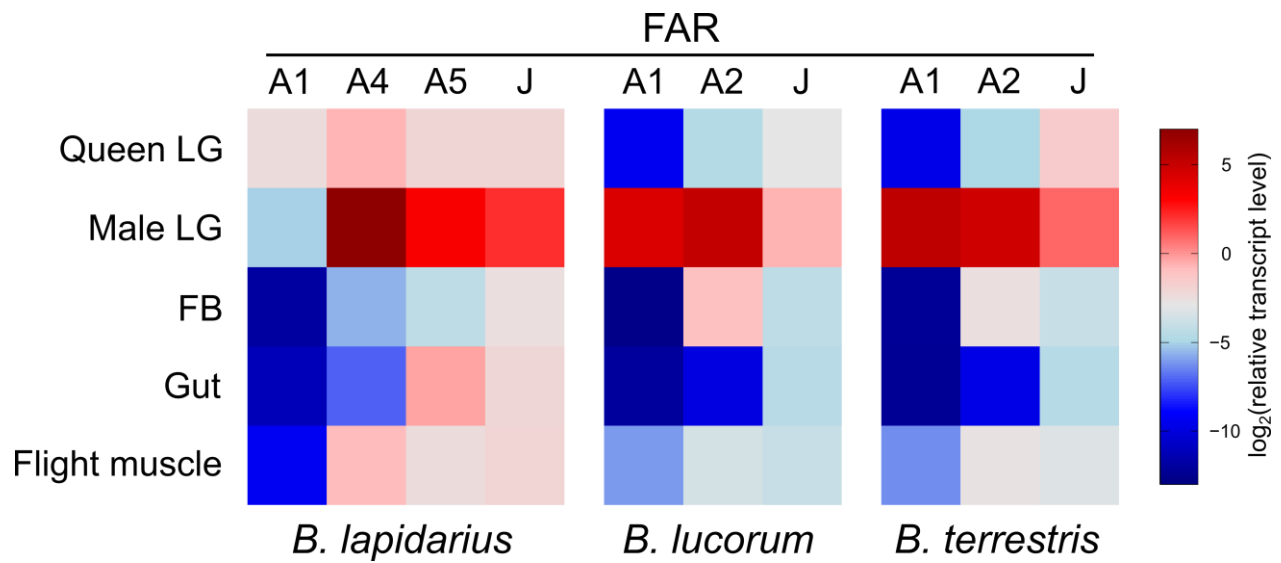

962 **Figure 3.** Relative transcript levels of FAR candidates across bumblebee tissues. The transcript  
963 levels were assayed by RT-qPCR in male tissues (LG, FB, gut, flight muscle) and in LGs  
964 of virgin queens.

965

966

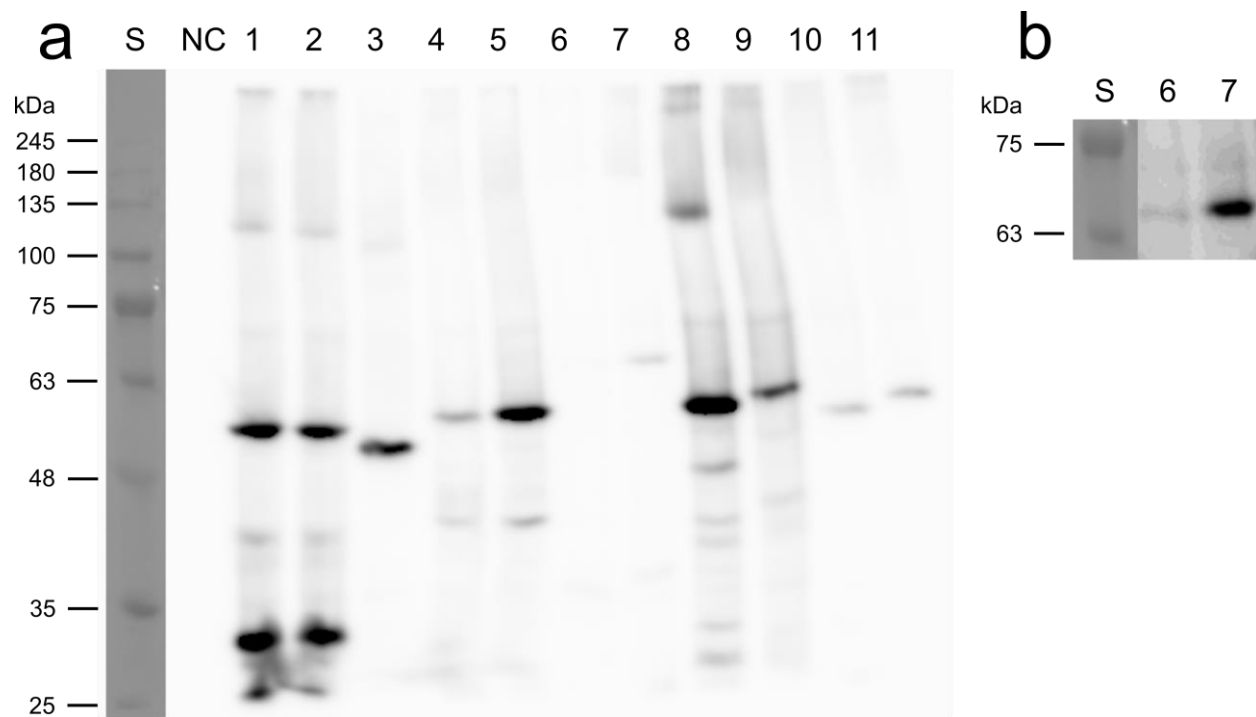

967

968 **Figure 4.** Western blot analysis of FAR protein expression in yeast cell lysates. (a) Photograph of  
969 the membrane after detection with anti-6×His-tag antibody. (b) Detail of the FAR-J full-length  
970 protein region with increased contrast. *Lanes:* S, protein standard (VI, AppliChem); NC, negative  
971 control (yeast carrying empty vector); 1–11, yeast strains carrying plasmids with *BlucFAR-A1*  
972 (1), *BterFAR-A1* (2), *BlapFAR-A1* (3), *BlucFAR-A2* (4), *BterFAR-A2* (5), *BterFAR-J* (6),  
973 *BlapFAR-J* (7), *BlapFAR-A4* (8), *BlapFAR-A5* (9), *BlucFAR-A1-opt* (10) and *BlucFAR-A2-opt*  
974 (11).

975

976

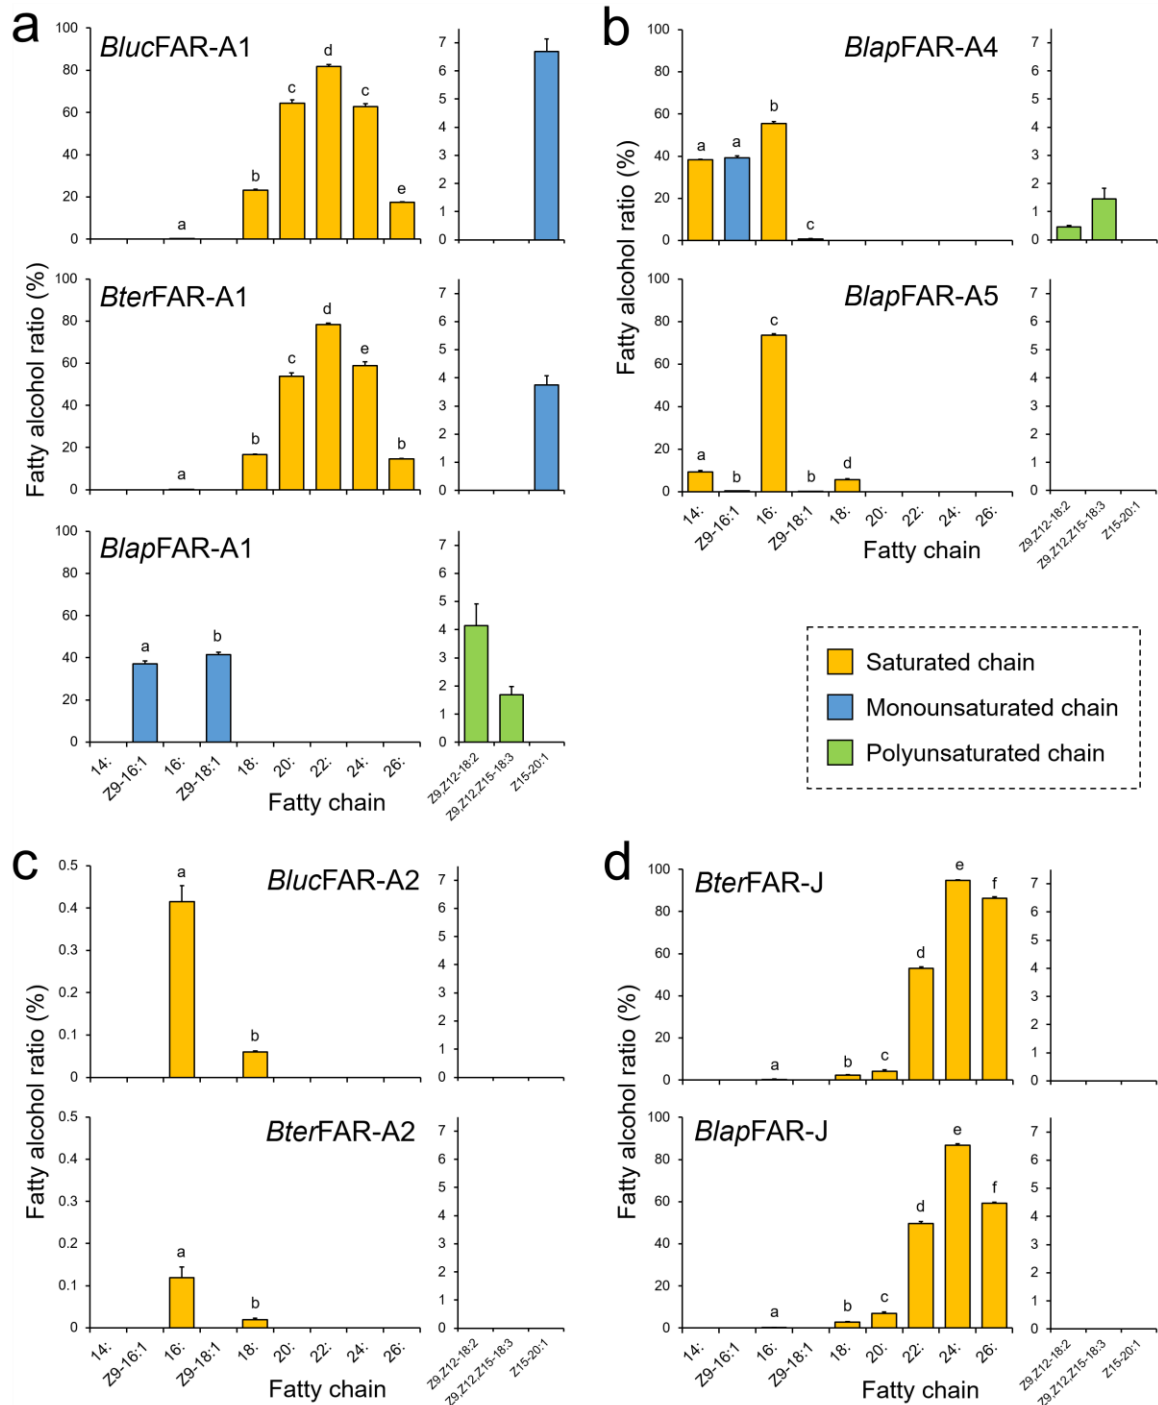

977

978 **Figure 5.** Fatty alcohol ratios in yeast strains expressing bumblebee FARs assayed on yeast

979 native lipids and after supplementation of yeast with either Z9,Z12-18:2, Z9,Z12,Z15-18:3 or

980 Z15-20:1 acyls. Significant differences ( $p < 0.01$ , one-way ANOVA followed by *post-hoc* Tukey's

981 HSD test) are marked with different letters. See Methods for description of fatty alcohol ratio

982 calculation.

983

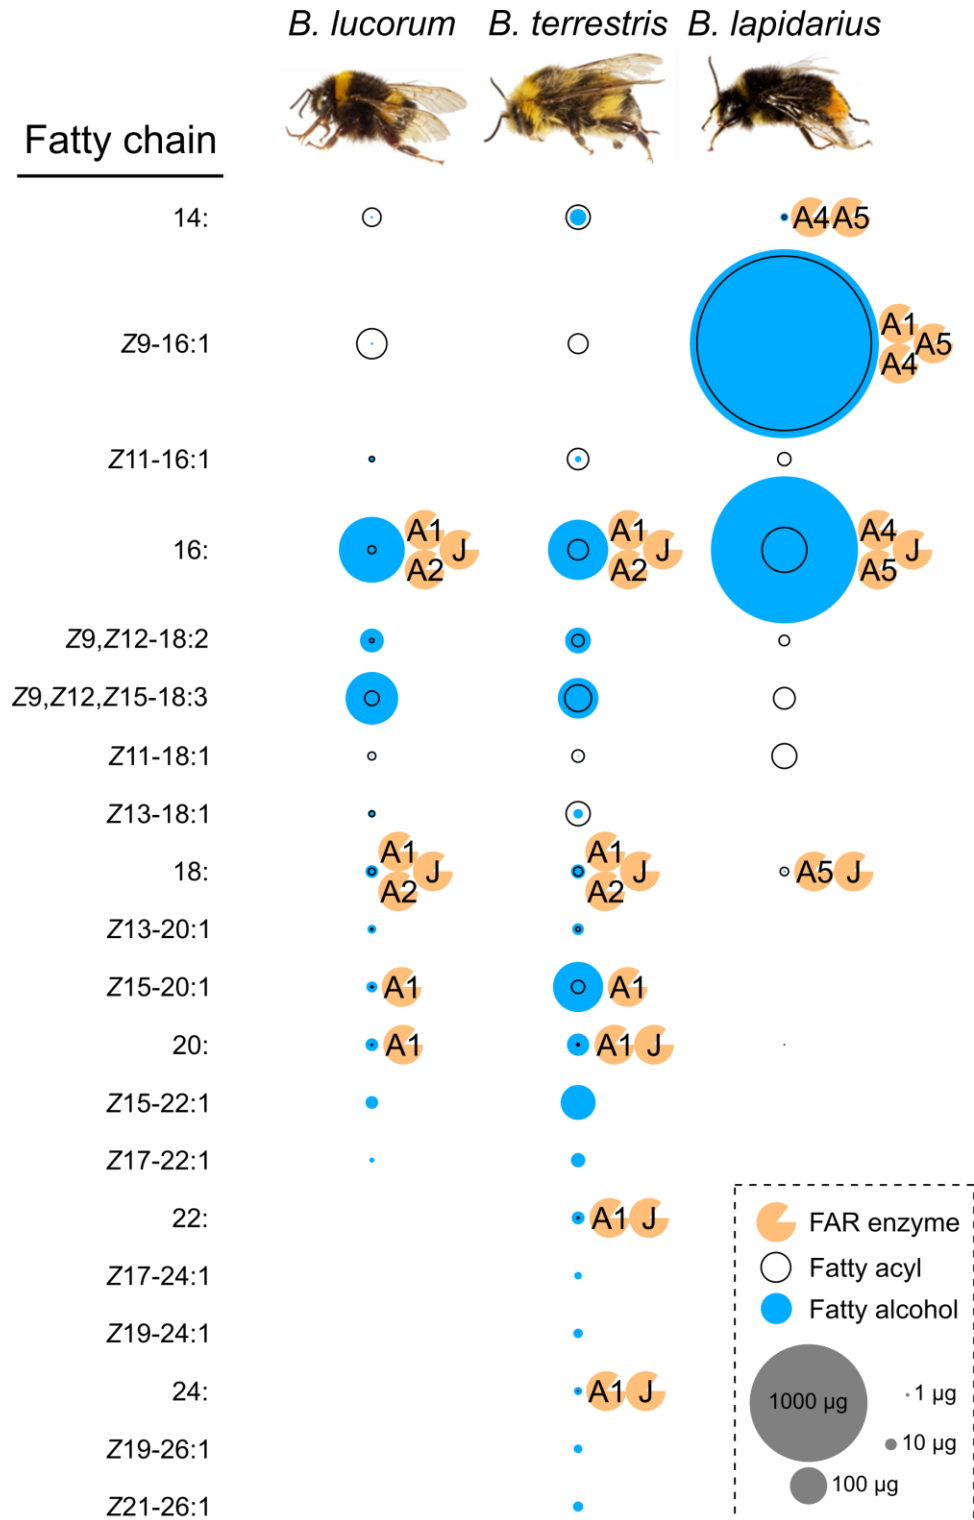

984

985

986 **Figure 6.** Fatty alcohol and fatty acyl composition in male LGs of *B. lucorum*, *B. terrestris* and  
987 *B. lapidarius* together with the proposed participation of FARs. The fatty acyls were determined  
988 as corresponding methyl esters. The size of fatty acyl and fatty alcohol circle, respectively,  
989 represents the average quantity in single male LG (Supplementary Table 5).  
990

991 **Supplementary Materials**

992

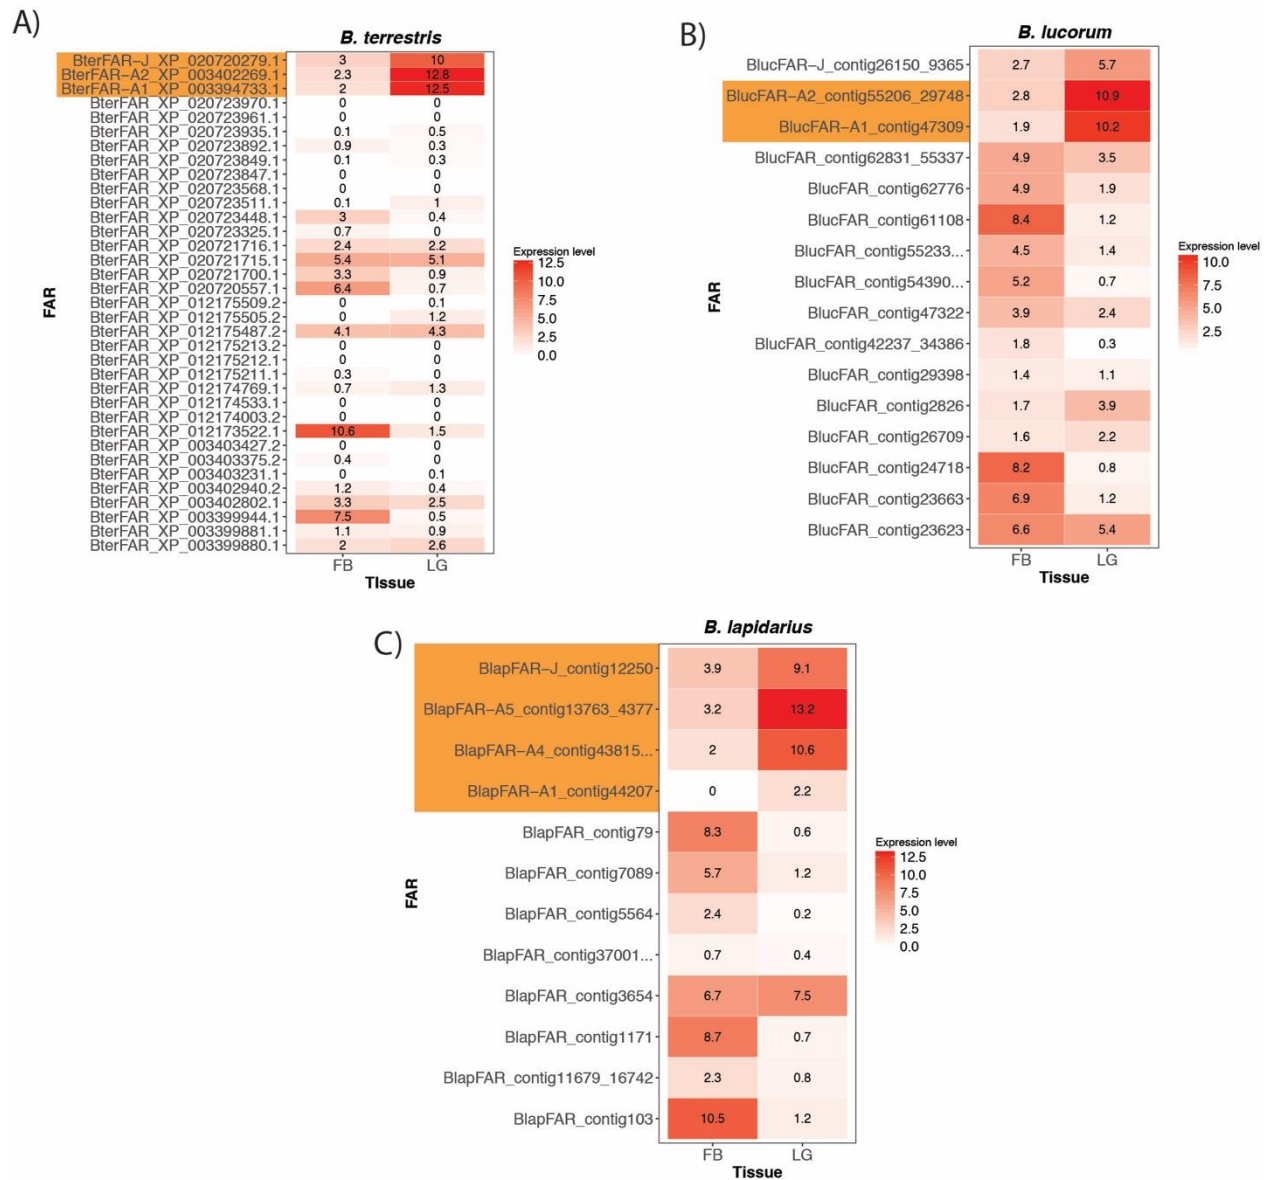

993

994 **Supplementary Figure 1.** Expression of FARs in male labial gland and male fat body of *Bombus*

995 *terrestris* (A), *B. lucorum* (B) and *B. lapidarius* (C). The expression values shown are log<sub>2</sub>-

996 transformed normalized counts of reads (RPKM values) mapping to the FAR coding regions.

997 FARs functionally characterized in this study are highlighted in orange.

998

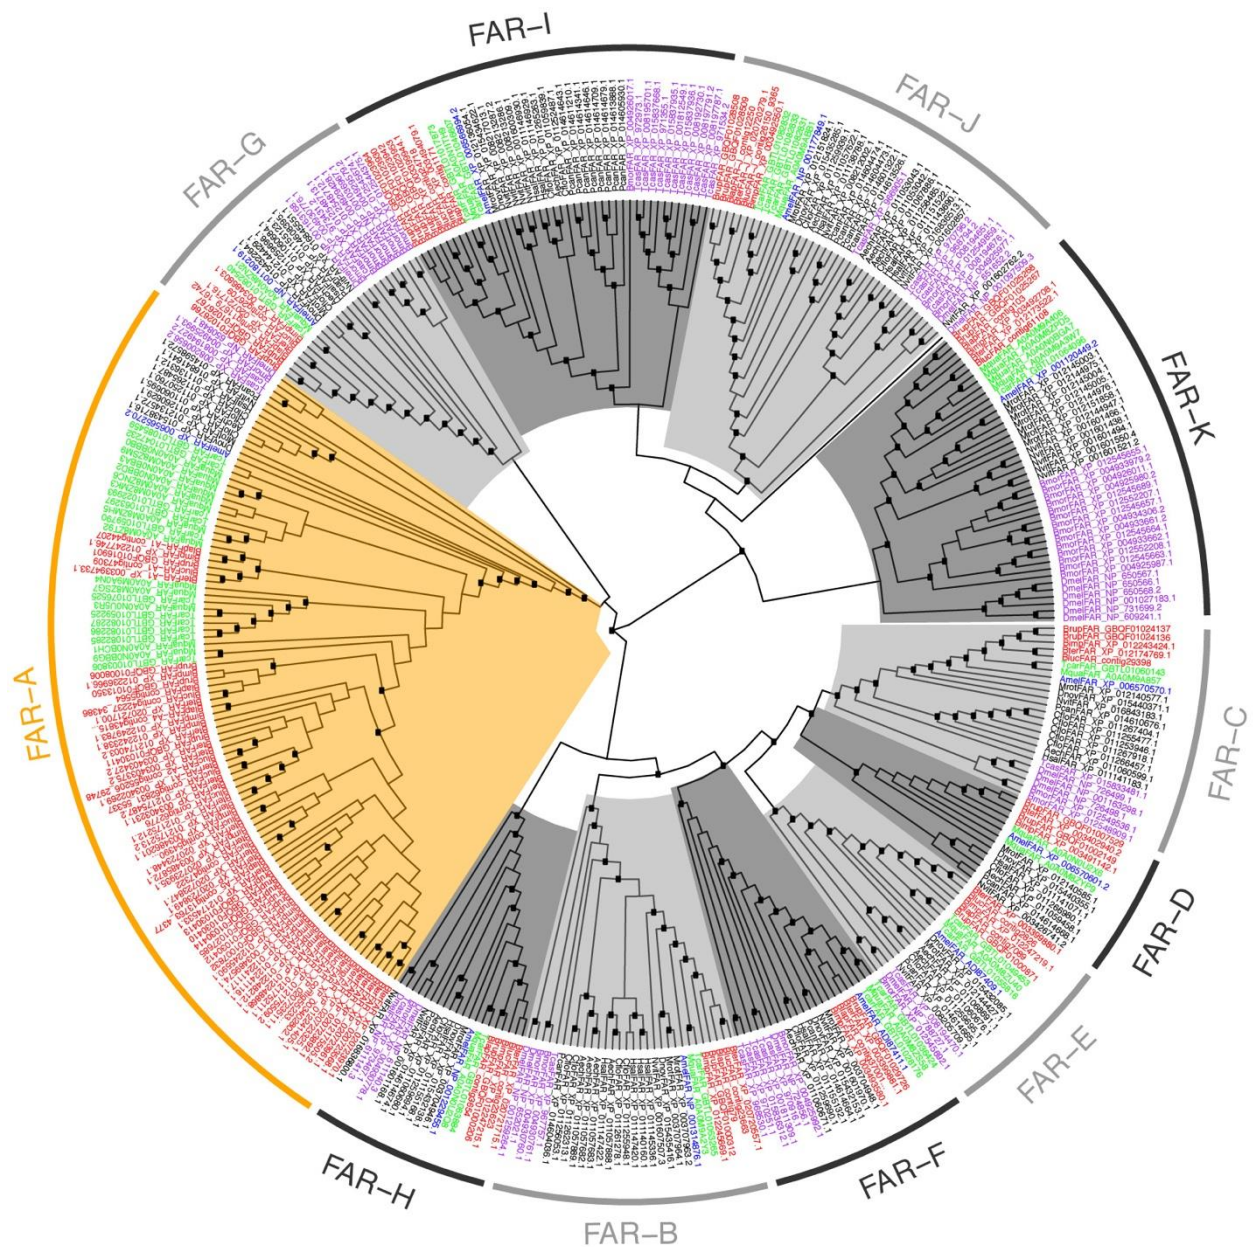

999  
1000 **Supplementary Figure 2.** FAR gene tree including non-hymenopteran (*Drosophila*  
1001 *melanogaster*, *Bombyx mori*, *Tribolium castaneum*) and hymenopteran FARs. Tree tips are  
1002 coloured according to taxonomy: red, bumblebee FARs (*B. terrestris*, *B. lucorum*, *B. lapidarius*,  
1003 *B. impatiens*, *B. rupestris*); green, stingless bee FARs (*Tetragonula carbonaria*, *Melipona*  
1004 *quadrifasciata*); blue, *A. mellifera* FARs; black, FARs from other hymenopteran species; purple,  
1005 non-hymenopteran species. The FAR-A orthology group is highlighted in orange; other  
1006 orthologous groups are in shades of grey. Internal nodes highlighted with black boxes indicate



1007 bootstrap support >95 %.

1008

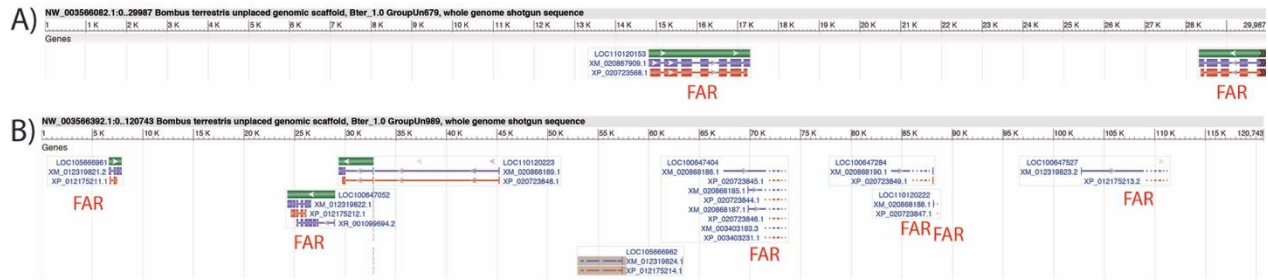

1009

1010 **Supplementary Figure 3.** Clusters of *B. terrestris* FAR-A genes on *B. terrestris* genomic

1011 scaffolds Un679 (A) and Un989 (B). The horizontal axis shows genomic coordinates of genes

1012 within the scaffold. FAR genes are labelled.

1013

1014

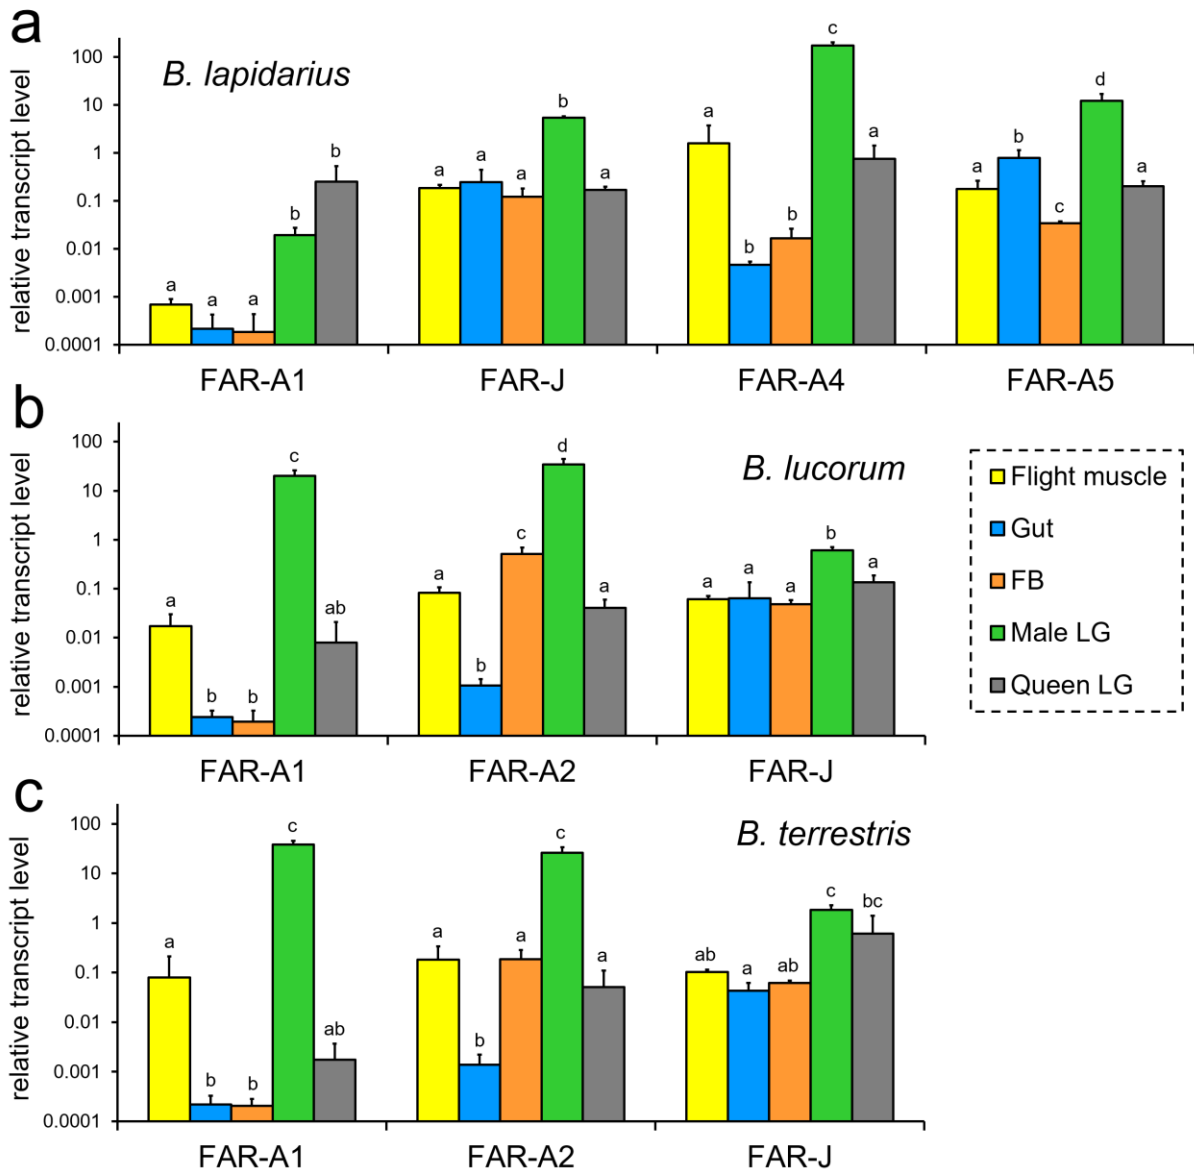

1015  
1016 **Supplementary Figure 4.** Relative transcript levels of FARs in the tissues of *B. lapidarius* (a), *B.*  
1017 *lucorum* (b) and *B. terrestris* (c). Significant differences ( $p < 0.05$ , one-way ANOVA followed by  
1018 *post-hoc* Tukey's HSD test) are marked with different letters.

1019

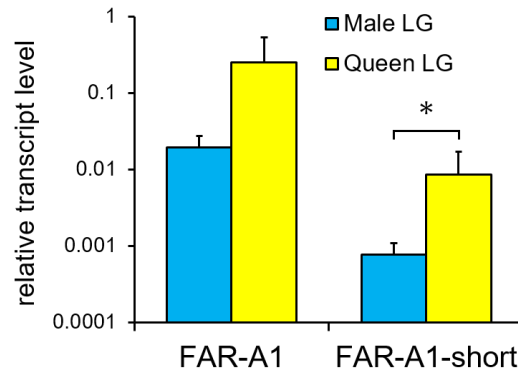

1020  
1021 **Supplementary Figure 5.** Relative transcript levels of FAR1 and FAR1-short in male and queen  
1022 LGs of *B. lapidarius*. Significant differences ( $p < 0.05$ , two-tailed  $t$ -test) are indicated with an  
1023 asterisk.

1024

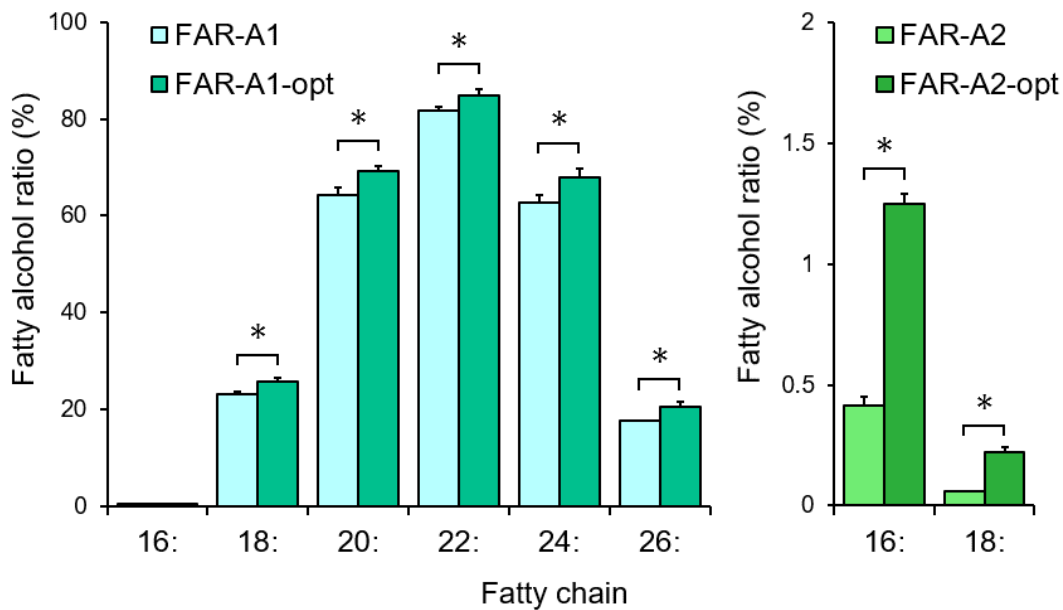

1025  
1026 **Supplementary Figure 6.** Fatty alcohol production by FARs from *B. lucorum* expressed from  
1027 yeast codon-optimized and wild-type nucleotide sequences. Significant differences ( $p < 0.05$ ,  
1028 two-tailed  $t$ -test) are marked with asterisks. See Methods for a description of fatty alcohol ratio  
1029 calculation.

1030

1031

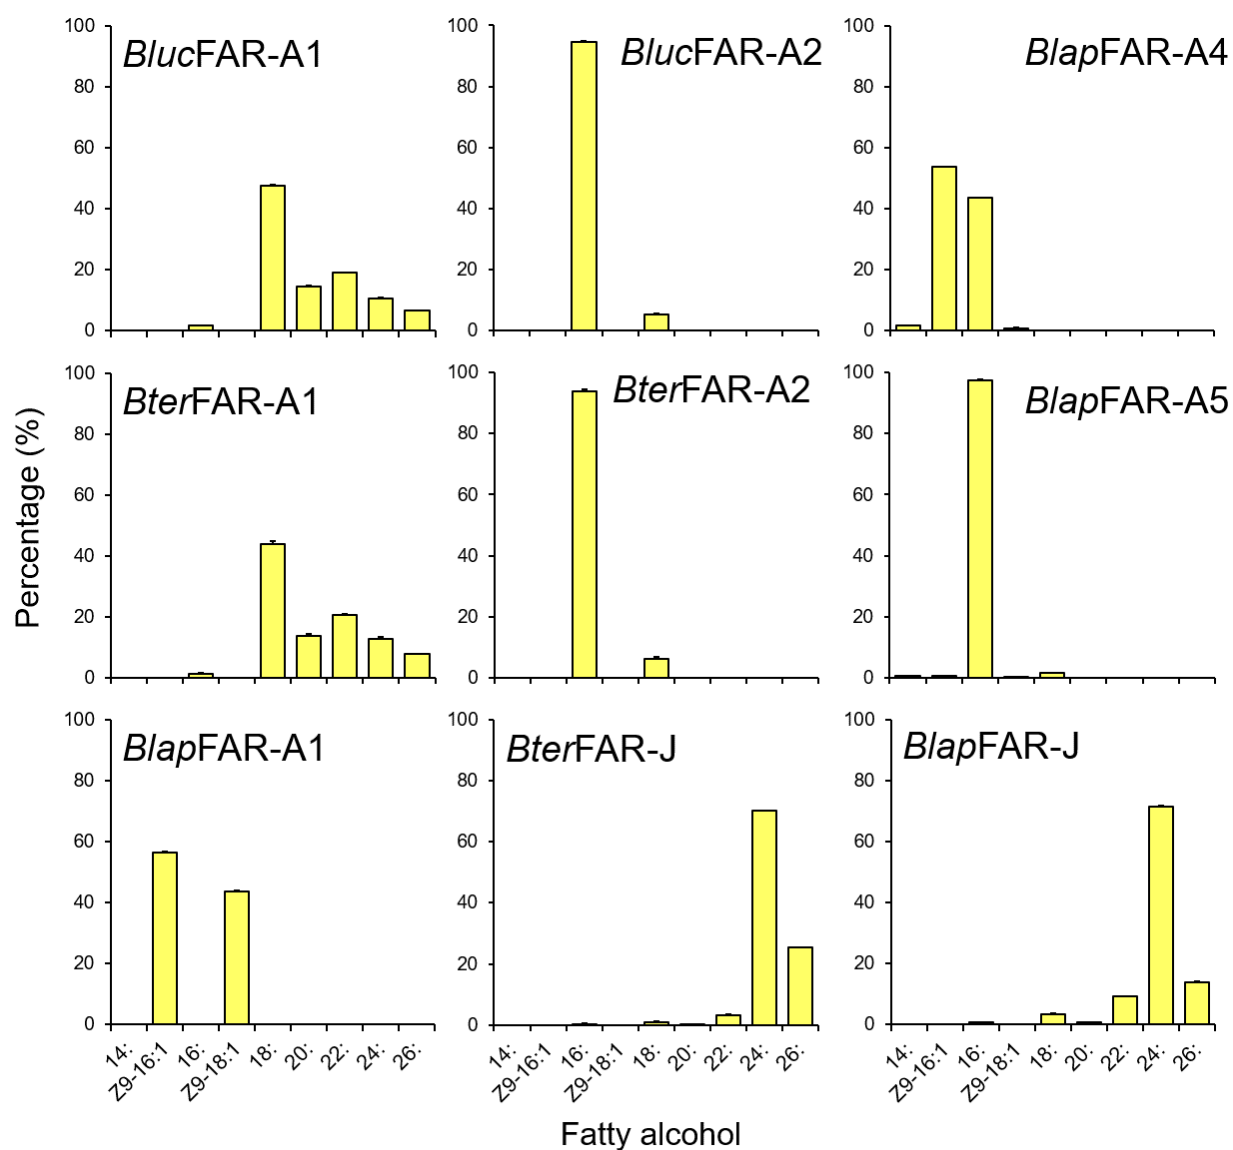

1032

1033 **Supplementary Figure 7.** Fatty alcohol production in yeast strains expressing bumblebee FARs

1034 calculated as ratios of a particular alcohol to the total produced fatty alcohols.

1035

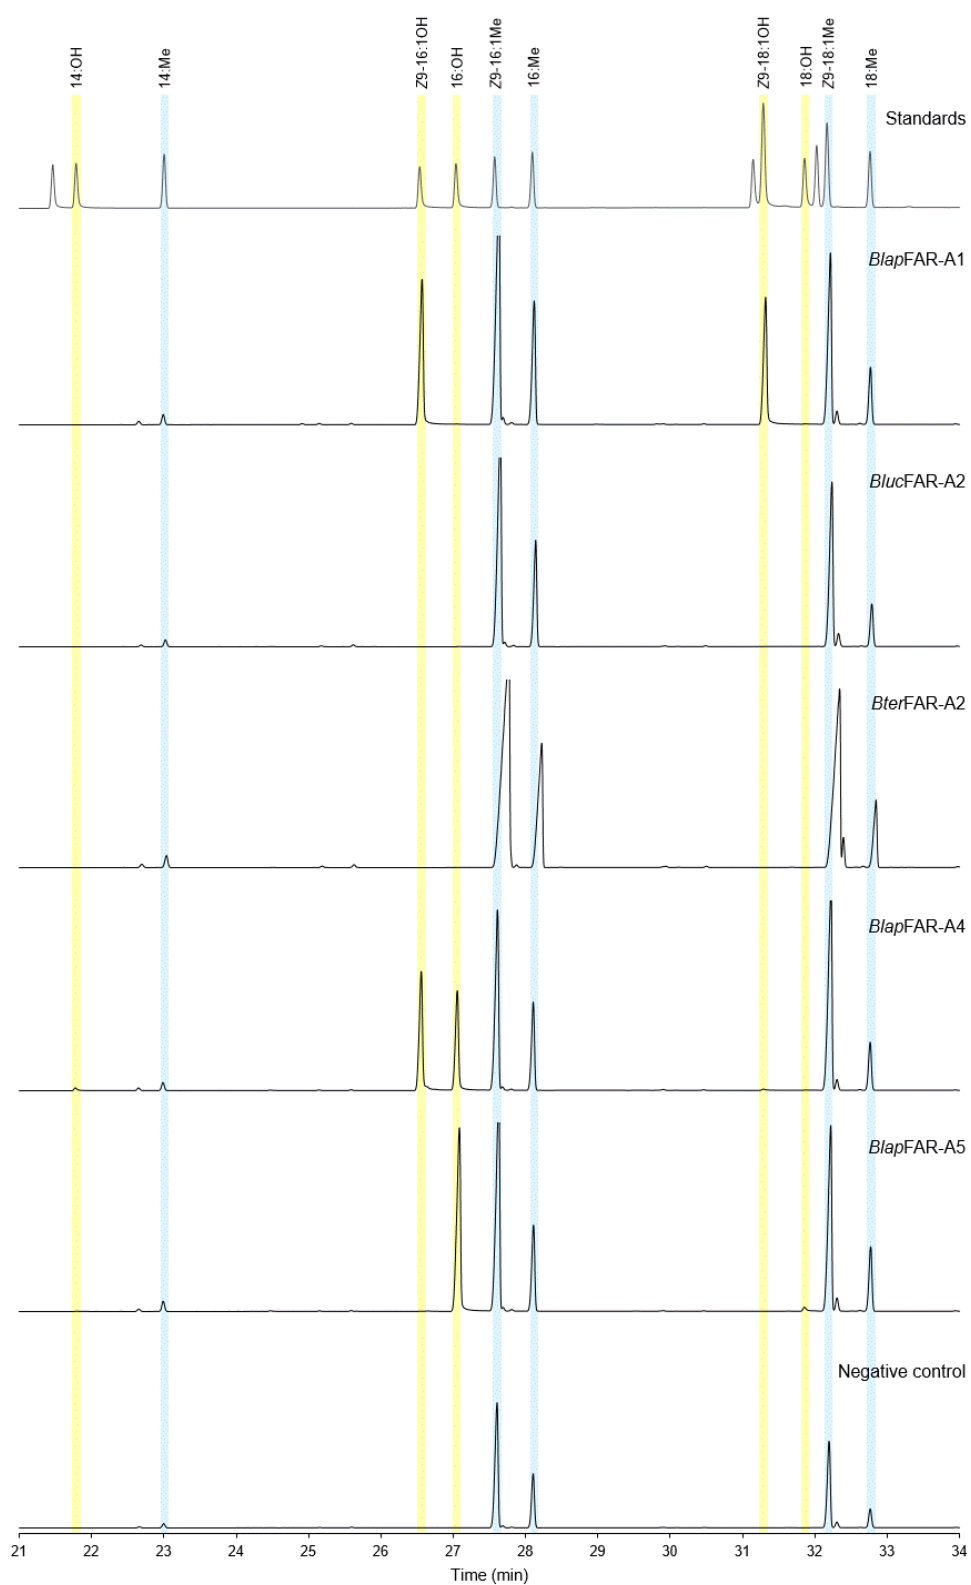

1036

1037 **Supplementary Figure 8.** GC-FID chromatograms of extracts from control yeast strain and  
1038 strains expressing FARs specific for long chain fatty acyls (C14–C18).

1039

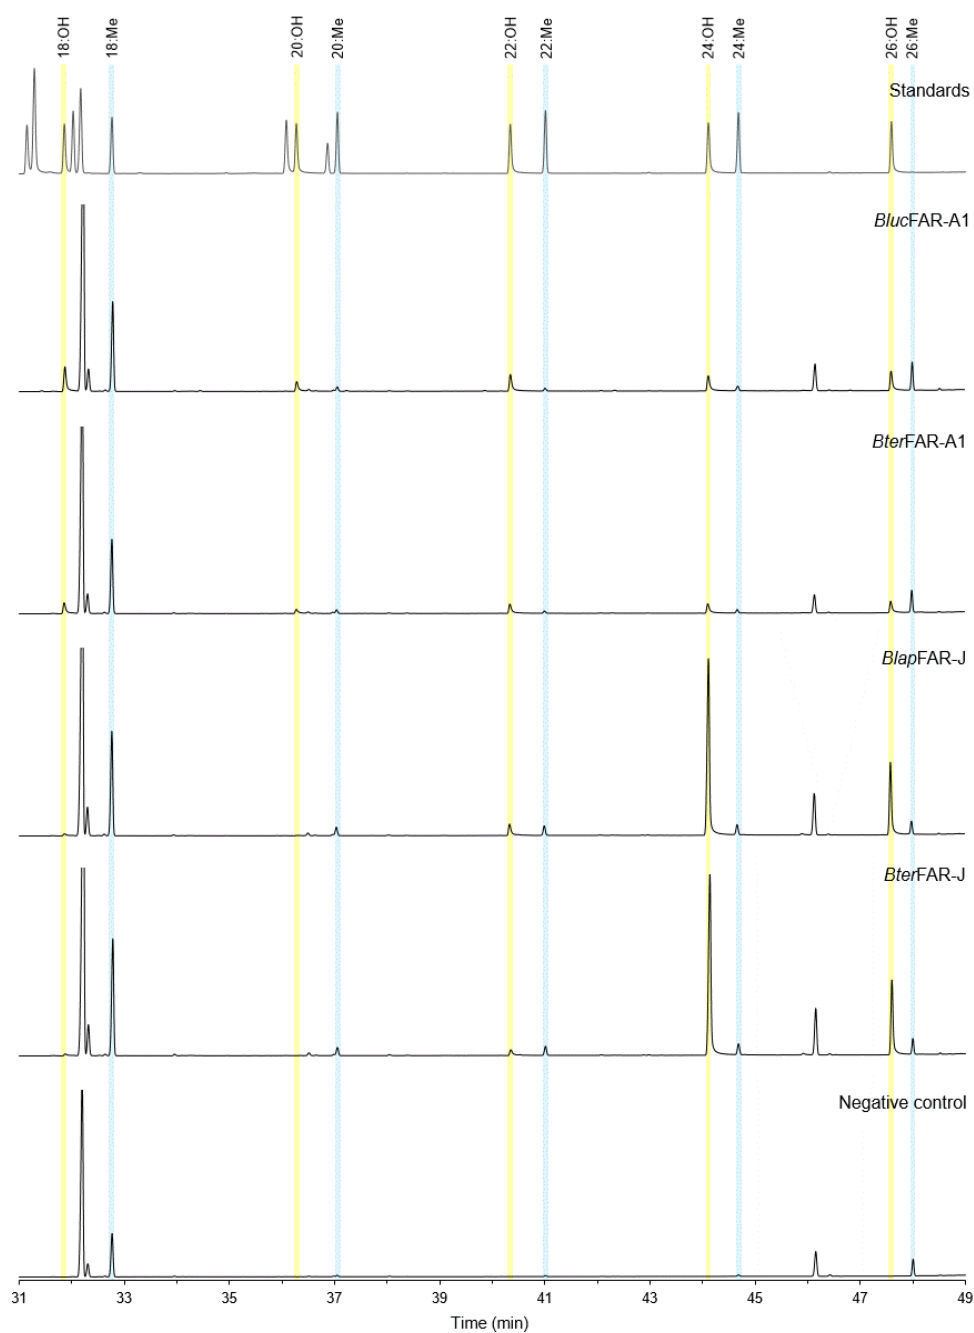

1040

1041 **Supplementary Figure 9.** GC-FID chromatograms of extracts from control yeast strain and  
1042 strains expressing FARs specific for very long chain fatty acyls (C20–C26).

1043

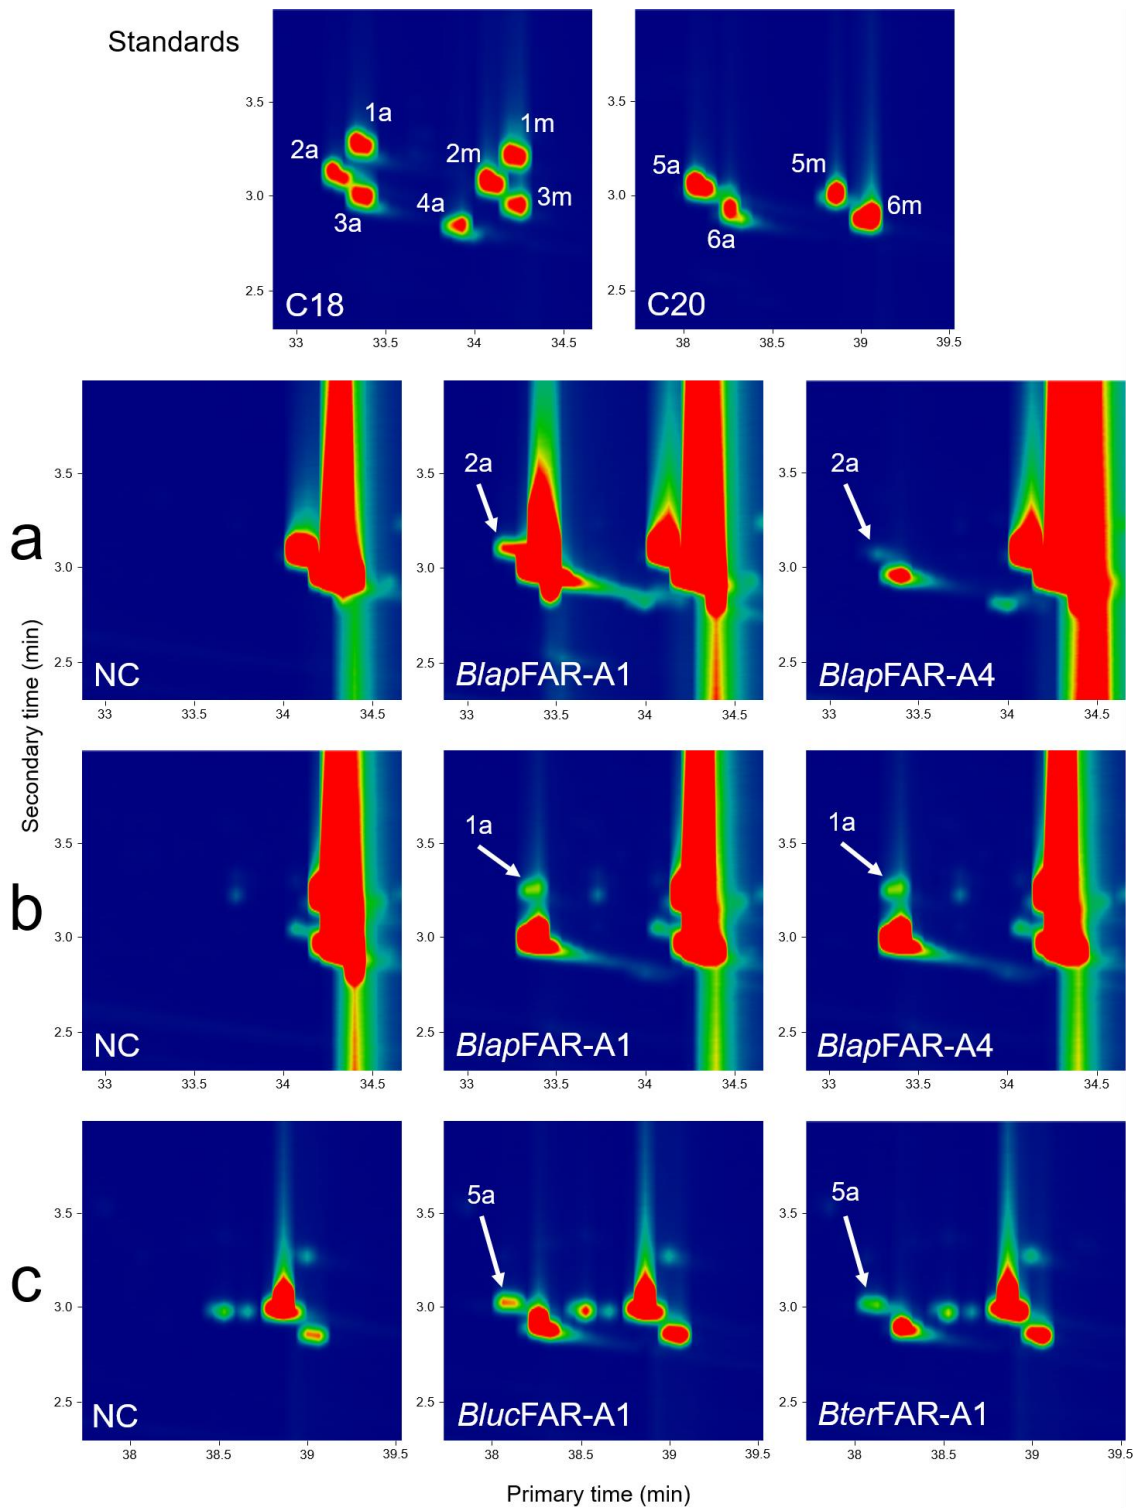

1044

1045 **Supplementary Figure 10.** GC×GC-MS chromatograms of extracts from yeast strains

1046 supplemented with Z9,Z12-18:2 (a), Z9,Z12,Z15-18:3 (b) and Z15-20:1 (c) acyls. NC, negative

1047 control (yeast carrying empty vector); 1a, Z9,Z12,Z15-18:3OH; 1m, Z9,Z12,Z15-18:3Me; 2a,

1048 Z9,Z12-18:2OH; 2m, Z9,Z12-18:2Me; 3a, Z9-18:1OH; 3m, Z9-18:1Me; 4a, 18:OH; 5a,  
1049 Z15-20:1OH; 5m, Z15-20:1Me; 6a, 20:OH; 6m, 20:Me. Selected masses: (a) 55+67, (b) 55+79,  
1050 (c) 55+74, standards 55+67+74+79.

1051  
1052  
1053  
1054  
1055  
1056  
1057

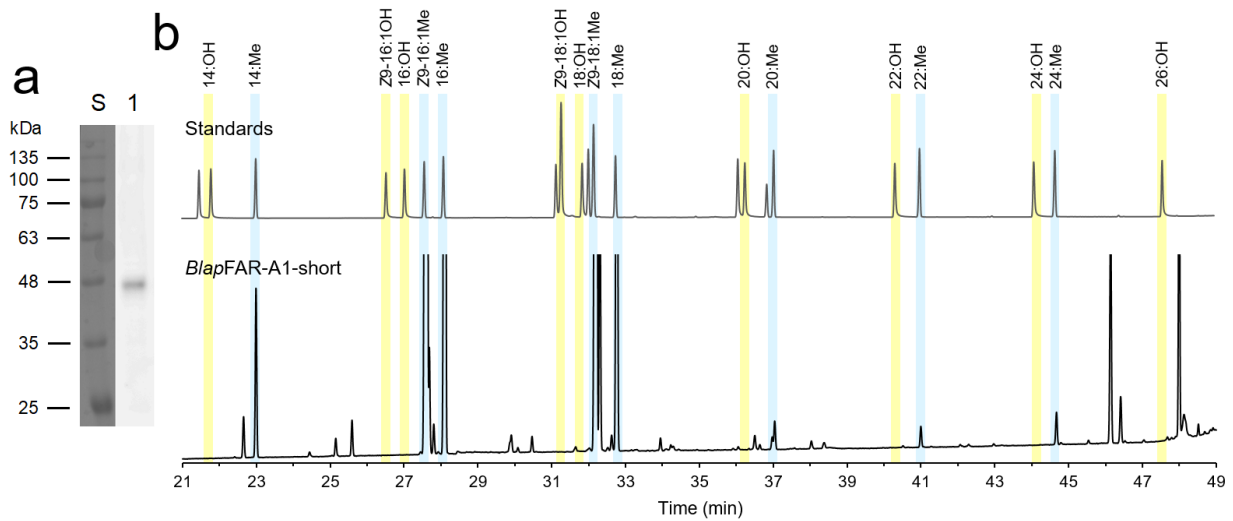

1058  
1059 **Supplementary Figure 11.** (a) Western blot analysis of cell lysate of yeast transformed with  
1060 *BlapFAR-A1-short*. Lanes: S, protein standard (VI, AppliChem); 1, yeast carrying plasmid with  
1061 the sequence of *BlapFAR-A1-short*. (b) GC-FID chromatogram of an extract from the yeast  
1062 strain expressing *BlapFAR-A1-short*.

1063  
1064



1065

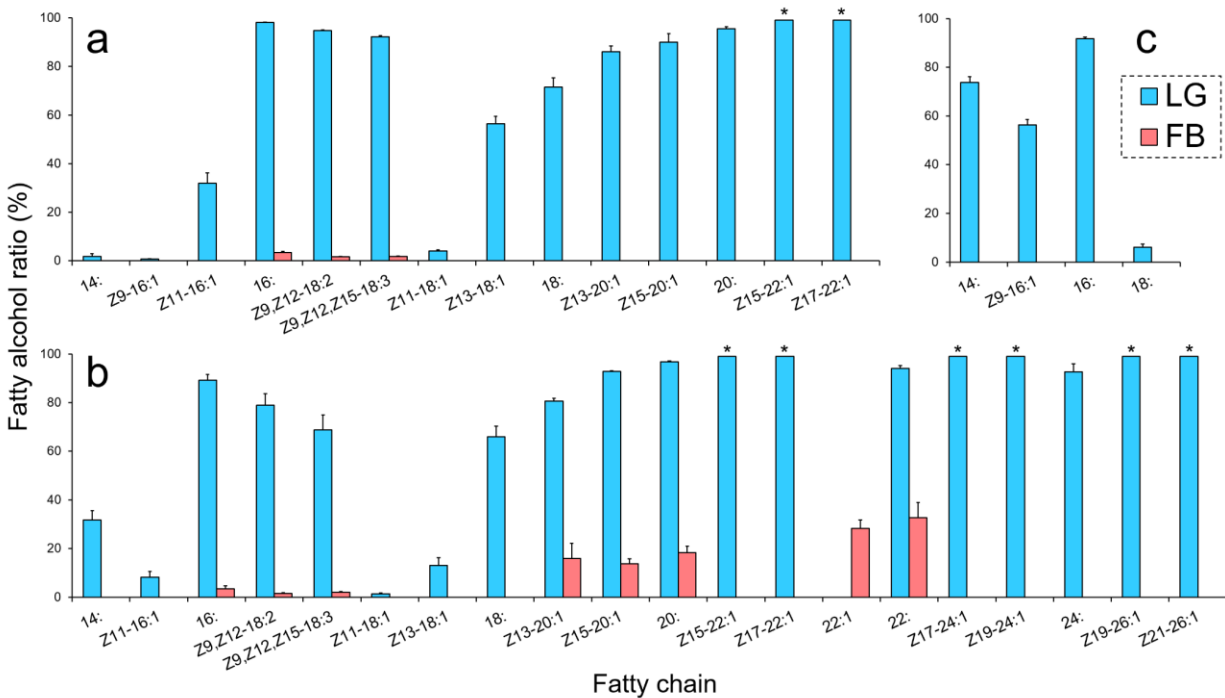

1066

1067 **Supplementary Figure 12.** Fatty alcohol ratios in LGs and FBs of 3-day-old *B. lucorum* (a), *B.*

1068 *terrestris* (b) and *B. lapidarius* (c) males. Ratios >99% are marked with asterisks. In the case of

1069 22:1 in FB of *B. terrestris*, the assignment of individual alcohol isomers was not possible due to

1070 low amount. See Methods for a description of fatty alcohol ratio calculation.

1071

1072

1073 **Supplementary Table 1.** Predicted protein sequence lengths and conserved domains detected in

1074 predicted FAR coding regions via Conserved Domain Database search. The presence of a domain

1075 or conserved feature is marked with "+".

1076

1077 **Supplementary Table 2.** Genomic linkage group or scaffold and orthology group of *B. terrestris*

1078 and *A. mellifera* FARs. *B. terrestris* FARs functionally characterized in this study and *A. mellifera*

1079 FAR previously functionally characterized are highlighted in green; FAR-A gene orthologs are

1080 highlighted in orange; genomic scaffolds not placed into linkage groups are grey.

| <i>Bombus terrestris</i> |                   |                        |
|--------------------------|-------------------|------------------------|
| NCBI accession number    | orthologous group | linkage group/scaffold |
| XP_020721700.1           | FAR-A             | LG B12                 |
| XP_020723892.1           | FAR-A             | GroupUn1136            |
| XP_020723935.1           | FAR-A             | GroupUn1199            |
| XP_003403375.2           | FAR-A             | GroupUn1674            |
| XP_003402269.1           | FAR-A             | GroupUn17              |
| XP_012175487.2           | FAR-A             | GroupUn3510            |
| XP_012175505.2           | FAR-A             | GroupUn4066            |
| XP_020723961.1           | FAR-A             | GroupUn4067            |
| XP_012175509.2           | FAR-A             | GroupUn4179            |
| XP_020723448.1           | FAR-A             | GroupUn442             |
| XP_020723970.1           | FAR-A             | GroupUn4704            |
| XP_003403427.2           | FAR-A             | GroupUn4997            |
| XP_020723325.1           | FAR-A             | GroupUn51              |
| XP_012174003.2           | FAR-A             | GroupUn56              |
| XP_020723511.1           | FAR-A             | GroupUn610             |
| XP_003402802.1           | FAR-A             | GroupUn648             |
| XP_012174533.1           | FAR-A             | GroupUn679             |
| XP_020723568.1           | FAR-A             | GroupUn679             |
| XP_003403231.1           | FAR-A             | GroupUn989             |
| XP_012175211.1           | FAR-A             | GroupUn989             |
| XP_012175212.1           | FAR-A             | GroupUn989             |
| XP_012175213.2           | FAR-A             | GroupUn989             |
| XP_020723847.1           | FAR-A             | GroupUn989             |
| XP_020723849.1           | FAR-A             | GroupUn989             |
| XP_003394733.1           | FAR-A             | LG B04                 |
| XP_020720557.1           | FAR-B             | LG B01                 |
| XP_012174769.1           | FAR-C             | GroupUn732             |
| XP_003402940.2           | FAR-D             | GroupUn732             |
| XP_003399880.1           | FAR-E             | LG B12                 |
| XP_003399881.1           | FAR-F             | LG B12                 |
| XP_020721716.1           | FAR-G             | LG B12                 |
| XP_020721715.1           | FAR-H             | LG B12                 |
| XP_003399944.1           | FAR-I             | LG B12                 |
| XP_020720279.1           | FAR-J             | LG B01                 |
| XP_012173522.1           | FAR-K             | LG B17                 |
| <i>Apis mellifera</i>    |                   |                        |
| NCBI accession number    | orthologous group | linkage group/scaffold |
| XP_006565270.2           | FAR-A             | LG12                   |
| NP_001314876.1           | FAR-B             | LG1                    |
| XP_006570570.1           | FAR-C             | LG6                    |
| XP_006570601.2           | FAR-D             | LG6                    |
| ADI87409.1               | FAR-E             | LG12                   |
| ADI87411.1               | FAR-F             | LG12                   |
| NP_001180219.1           | FAR-G             | LG12                   |
| NP_001229455.1           | FAR-H             | LG12                   |
| XP_006566994.2           | FAR-I             | LG12                   |
| NP_001177849.1           | FAR-J             | Un                     |
| XP_001120449.2           | FAR-K             | LG5                    |

1081

1082 **Supplementary Table 3.** Primers used in this study. Restriction sites are underlined.

| Name                     | Sequence 5'→3'                            | Origin            |
|--------------------------|-------------------------------------------|-------------------|
| BlapFAR-A5_RACE_5end-R   | CGCACTATCCCAACTGGCAG                      |                   |
| BlapFAR-A5_RACE_3end-F   | GCATCAAAGCAAAACACCAGTCAG                  |                   |
| BterBlucFAR-A1_SphI-F    | AAAAAAGCATGCATGAATACGGAATTTACAG           |                   |
| BterBlucFAR-A1_NotI-R    | AAAAAAGCGGCCGCTTATTAGTACATAACA            |                   |
| BlucFAR-A1-opt_BamHI-F   | AAAGGATCCAACACTGAGTTCACTGAAAAG            |                   |
| BlucFAR-A1-opt_EcoRI-R   | AAAGAATTCTCAATACATAACTCTCAAAAATAATG       |                   |
| BterFAR-A2_BamHI-F       | AAAAAAGGATCCATGAATACGATCAATAGAG           |                   |
| BlucFAR-A2_BamHI-F       | AAAAGGATCCATGGATACGATCAATAGA              |                   |
| BterBlucFAR-A2_NotI-R    | AAAAGCGGCCGCTTATTAGTATACAAAATAT           |                   |
| BlucFAR-A2-opt_BamHI-F   | AAAGGATCCGACACCATTAAC                     |                   |
| BlucFAR-A2-opt_EcoRI-R   | AAAGAATTCTCAATAGACGAAATAC                 |                   |
| BterBlucFAR-J-TOPO-F     | ATGGTGGAAGTTCTGGTG                        |                   |
| BterBlucFAR-J-TOPO-R     | TTACGCAAATTGAGGTATACAATTTTC               |                   |
| BterFAR-J-InFusion-F     | TCACCATCACGGATCCGTGGAAGTTCTGGTGGAAC       |                   |
| BterFAR-J-InFusion-R     | GGAAGTTAATGAATTCTTACGCAAATTGAGGTATACA     |                   |
| BlapFAR-A1_BamHI-F       | CGTGGATCCAATACAAAACCTTAATGAAAACGAGATAAATG |                   |
| BlapFAR-A1_NotI-R        | TTTAGCGGCCGCTTACGGCGCCGCATTTATAGATTTAG    |                   |
| BlapFAR-A1-syn_BamHI-F   | AAGGATCCAATACAAAACCTTAATG                 |                   |
| BlapFAR-A1-syn_NotI-R    | AATCAAGCGGCCGCTTACGGC                     |                   |
| BlapFAR-J_SphI-F         | ACAATGCATGCGTGGAAGTTCTGGTGGAAC            |                   |
| BlapFAR-J_NotI-R         | ACAAGAATGCGGCCGCTTACGCAAATTGAGGTATACAA    |                   |
| BlapFAR-A4_BamHI-F       | CTTGGATCCGATACAATCAATAAAGAAAAG            | This study        |
| BlapFAR-A4_EcoRI-R       | CATGAATTCTCAATAAACGATACAGTATAC            |                   |
| BlapFAR-A5_BamHI-F       | GACAAGGATCCGATACAACCGATAAA                |                   |
| BlapFAR-A5_NotI-R        | TAAGTGGCGCCGCTCAGTACACAAAATA              |                   |
| BterBlucFAR-A1_qPCR-F    | ACACGGCAATGGTCCCTTCAA                     |                   |
| BterBlucFAR-A1_qPCR-R    | AAAAATAAATTTCTTTATTCTTATGACGCA            |                   |
| BterBlucFAR-A2_qPCR-F    | AGCAGAGCAAATTGTAGCAAGC                    |                   |
| BterBlucFAR-A2_qPCR-R    | ACTACATCCACTCTTCCATCTCTCC                 |                   |
| BterBlucBlapFAR-J_qPCR-F | TGCGAGGATGGATCGACAAC                      |                   |
| BterBlucBlapFAR-J_qPCR-R | TCTTTGGTAGTTGCAGATTTTCGAC                 |                   |
| BlapFAR-A1_qPCR-F        | AAGAAAAGGTCTACACCACGAATC                  |                   |
| BlapFAR-A1_qPCR-R        | TCGCAACAGTCAATCCTTTG                      |                   |
| BlapFAR1-A1-short_qPCR-F | AATCTATCAGACATCGAAGAATTGATTA              |                   |
| BlapFAR1-A1-short_qPCR-R | CAGGGAACGGTTCTTTTAGC                      |                   |
| BlapFAR-A4_qPCR-F        | AGTGACAGCATATTTTCGCTCTG                   |                   |
| BlapFAR-A4_qPCR-R        | AAACGATACAGTATACAATCAGTAGTG               |                   |
| BlapFAR-A5_qPCR-F        | AGTTGAAAAATGCCGTGTTGAAG                   |                   |
| BlapFAR-A5_qPCR-R        | GTGCGTGGTGAAATATGTTACCGA                  |                   |
| BlapEEF1A_qPCR-F         | AGAATGGACAAACCCGCGAG                      |                   |
| BlapEEF1A_qPCR-R         | CACAAATGCCACCGCAACAG                      |                   |
| BlapPLA2_qPCR-F          | GGTCACACCGAAACCAAATT                      |                   |
| BlapPLA2_qPCR-R          | TCGCAACATTTTCGTCATTTTC                    |                   |
| BterBlucEEF1A_qPCR-F     | AGAATGGACAAACCCGTGAG                      |                   |
| BterBlucEEF1A_qPCR-R     | CACAAATGCTACCGCAACAG                      | Ref <sup>86</sup> |
| BterBlucPLA2_qPCR-F      | GGTCACACCGAAACCAAGATT                     |                   |
| BterBlucPLA2_qPCR-R      | TCGCAACACTTTCGTCATTTTC                    |                   |

1084  
 1085 **Supplementary Table 4.** Protein sequence identities of bumblebee male marking pheromone  
 1086 (MMP)-biosynthetic FAR candidates. The colors indicate % identity (red: highest, blue: lowest).

|                                 | 1     | 2     | 3     | 4     | 5     | 6     | 7     | 8     | 9    | 10  |
|---------------------------------|-------|-------|-------|-------|-------|-------|-------|-------|------|-----|
| 1: BterFAR-J_XP_020720279.1     | 100   |       |       |       |       |       |       |       |      |     |
| 2: BlucFAR-J_contig26150_9365   | 99.65 | 100   |       |       |       |       |       |       |      |     |
| 3: BlapFAR-J_contig12250        | 97.52 | 97.23 | 100   |       |       |       |       |       |      |     |
| 4: BlapFAR-A5_contig13763_4377  | 32.8  | 32.8  | 32.8  | 100   |       |       |       |       |      |     |
| 5: BlapFAR-A4_contig43815...    | 34    | 34    | 34    | 78.77 | 100   |       |       |       |      |     |
| 6: BterFAR-A2_XP_003402269.1    | 32.41 | 32.41 | 32.41 | 77.78 | 79.37 | 100   |       |       |      |     |
| 7: BlucFAR-A2_contig55206_29748 | 32.8  | 32.8  | 32.8  | 75.79 | 77.98 | 94.84 | 100   |       |      |     |
| 8: BlapFAR-A1_contig44207       | 33.9  | 33.9  | 34.11 | 57.75 | 56.69 | 54.56 | 54.99 | 100   |      |     |
| 9: BterFAR-A1_XP_003394733.1    | 33.6  | 33.6  | 33.6  | 56.65 | 57.26 | 53.83 | 52.82 | 60.9  | 100  |     |
| 10: BlucFAR-A1_contig47309      | 33.4  | 33.4  | 33.4  | 56.85 | 57.26 | 53.83 | 52.82 | 61.11 | 99.4 | 100 |

1087

1088

1089 **Supplementary Table 5.** Comprehensive GC analysis of fatty alcohols and transesterifiable fatty  
 1090 acyls in LGs of 3-day-old *B. terrestris*, *B. lucorum* and *B. lapidarius* males. The acyls were  
 1091 determined as corresponding methyl esters. *nd*, not detected.

| Tissue          |                                    | Labial gland    |                   |                 |                      |                 |
|-----------------|------------------------------------|-----------------|-------------------|-----------------|----------------------|-----------------|
| Species         | <i>B. lapidarius</i>               |                 | <i>B. lucorum</i> |                 | <i>B. terrestris</i> |                 |
| Fatty chain     | Amount ( $\mu\text{g}$ per tissue) |                 |                   |                 |                      |                 |
|                 | Acyl                               | Alcohol         | Acyl              | Alcohol         | Acyl                 | Alcohol         |
| Z7-12:          | <i>nd</i>                          | <i>nd</i>       | $0.84 \pm 0.07$   | <i>nd</i>       | <i>nd</i>            | <i>nd</i>       |
| Z9-12:          | <i>nd</i>                          | <i>nd</i>       | <i>nd</i>         | <i>nd</i>       | $1.58 \pm 0.08$      | <i>nd</i>       |
| 12:             | $0.61 \pm 0.04$                    | <i>nd</i>       | $122 \pm 4$       | <i>nd</i>       | $406 \pm 24$         | <i>nd</i>       |
| Z5-14:1         | <i>nd</i>                          | <i>nd</i>       | $2.39 \pm 0.14$   | <i>nd</i>       | <i>nd</i>            | <i>nd</i>       |
| Z7-14:1         | $0.19 \pm 0.02$                    | <i>nd</i>       | <i>nd</i>         | <i>nd</i>       | <i>nd</i>            | <i>nd</i>       |
| Z9-14:1         | $2.13 \pm 0.57$                    | <i>nd</i>       | $1419 \pm 192$    | <i>nd</i>       | $103 \pm 18$         | <i>nd</i>       |
| 14:             | $1.87 \pm 0.21$                    | $4.70 \pm 1.00$ | $28.7 \pm 2.9$    | $0.45 \pm 0.28$ | $47.5 \pm 4.7$       | $19.5 \pm 2.3$  |
| Z7-16:1         | <i>nd</i>                          | <i>nd</i>       | $14.2 \pm 2.1$    | <i>nd</i>       | $5.59 \pm 0.30$      | <i>nd</i>       |
| Z9-16:1         | $2236 \pm 447$                     | $2577 \pm 416$  | $72.2 \pm 5.7$    | $0.44 \pm 0.09$ | $32.6 \pm 0.6$       | <i>nd</i>       |
| Z11-16:1        | $15.8 \pm 2.0$                     | <i>nd</i>       | $3.40 \pm 0.90$   | $1.47 \pm 0.56$ | $37.7 \pm 4.0$       | $2.94 \pm 0.63$ |
| 16:             | $157 \pm 28$                       | $1560 \pm 216$  | $6.53 \pm 0.47$   | $313 \pm 52$    | $34.8 \pm 1.9$       | $263 \pm 46$    |
| Z9,Z12-18:2     | $10.6 \pm 2.5$                     | <i>nd</i>       | $2.50 \pm 0.53$   | $41.3 \pm 8.2$  | $13.9 \pm 1.2$       | $48.1 \pm 10.0$ |
| Z9,Z12,Z15-18:3 | $38.7 \pm 6.8$                     | <i>nd</i>       | $18.7 \pm 4.6$    | $201 \pm 42$    | $57.7 \pm 0.5$       | $119 \pm 31$    |
| Z9-18:1         | $119 \pm 29$                       | <i>nd</i>       | $57.0 \pm 9.2$    | <i>nd</i>       | $129 \pm 7$          | <i>nd</i>       |
| Z11-18:1        | $50.4 \pm 10.7$                    | <i>nd</i>       | $6.44 \pm 0.87$   | $0.25 \pm 0.07$ | $14.0 \pm 1.3$       | $0.18 \pm 0.05$ |
| Z13-18:1        | <i>nd</i>                          | <i>nd</i>       | $3.85 \pm 0.80$   | $4.48 \pm 0.45$ | $47.5 \pm 3.3$       | $6.50 \pm 1.56$ |
| 18:             | $7.27 \pm 1.51$                    | $0.41 \pm 0.02$ | $5.16 \pm 0.29$   | $11.9 \pm 2.4$  | $8.35 \pm 0.98$      | $14.7 \pm 1.4$  |
| Z11-20:1        | <i>nd</i>                          | <i>nd</i>       | $0.70 \pm 0.03$   | <i>nd</i>       | $2.81 \pm 0.51$      | <i>nd</i>       |
| Z13-20:1        | <i>nd</i>                          | <i>nd</i>       | $1.02 \pm 0.20$   | $5.79 \pm 0.76$ | $2.65 \pm 0.40$      | $10.1 \pm 1.4$  |
| Z15-20:1        | <i>nd</i>                          | <i>nd</i>       | $1.01 \pm 0.23$   | $8.77 \pm 2.37$ | $15.5 \pm 1.3$       | $182 \pm 23$    |
| 20:             | $0.21 \pm 0.04$                    | <i>nd</i>       | $0.60 \pm 0.05$   | $11.9 \pm 1.4$  | $1.31 \pm 0.08$      | $35.9 \pm 6.9$  |
| Z15-22:1        | <i>nd</i>                          | <i>nd</i>       | <i>nd</i>         | $11.8 \pm 2.8$  | <i>nd</i>            | $88.1 \pm 9.5$  |
| Z17-22:1        | <i>nd</i>                          | <i>nd</i>       | <i>nd</i>         | $1.88 \pm 0.24$ | <i>nd</i>            | $14.9 \pm 1.4$  |
| 22:             | <i>nd</i>                          | <i>nd</i>       | $0.21 \pm 0.09$   | <i>nd</i>       | $0.81 \pm 0.03$      | $12.2 \pm 2.6$  |
| Z17-24:1        | <i>nd</i>                          | <i>nd</i>       | <i>nd</i>         | <i>nd</i>       | <i>nd</i>            | $4.08 \pm 0.37$ |
| Z19-24:1        | <i>nd</i>                          | <i>nd</i>       | <i>nd</i>         | <i>nd</i>       | <i>nd</i>            | $6.46 \pm 1.42$ |
| 24:             | <i>nd</i>                          | <i>nd</i>       | <i>nd</i>         | <i>nd</i>       | $0.38 \pm 0.10$      | $4.79 \pm 1.14$ |
| Z19-26:1        | <i>nd</i>                          | <i>nd</i>       | <i>nd</i>         | <i>nd</i>       | <i>nd</i>            | $5.44 \pm 1.17$ |
| Z21-26:1        | <i>nd</i>                          | <i>nd</i>       | <i>nd</i>         | <i>nd</i>       | <i>nd</i>            | $7.51 \pm 2.29$ |
| 26:             | <i>nd</i>                          | <i>nd</i>       | <i>nd</i>         | <i>nd</i>       | $0.90 \pm 0.30$      | <i>nd</i>       |
| 28:             | <i>nd</i>                          | <i>nd</i>       | <i>nd</i>         | <i>nd</i>       | $0.12 \pm 0.03$      | <i>nd</i>       |

1092

1093

1094 **Supplementary Table 6.** Comprehensive GC analysis of fatty alcohols and transesterifiable fatty  
 1095 acyls in FBs of 3-day-old *B. terrestris*, *B. lucorum* and *B. lapidarius* males. The acyls were  
 1096 determined as corresponding methyl esters. *nd*, not detected.

| Tissue          | Fat body                           |           |                   |                  |                      |                 |
|-----------------|------------------------------------|-----------|-------------------|------------------|----------------------|-----------------|
|                 | <i>B. lapidarius</i>               |           | <i>B. lucorum</i> |                  | <i>B. terrestris</i> |                 |
| Species         | Amount ( $\mu\text{g}$ per tissue) |           |                   |                  |                      |                 |
| Fatty chain     | Acyl                               | Alcohol   | Acyl              | Alcohol          | Acyl                 | Alcohol         |
| 12:             | 76.3 $\pm$ 17.0                    | <i>nd</i> | 36.3 $\pm$ 10.6   | <i>nd</i>        | 120 $\pm$ 34         | <i>nd</i>       |
| Z5-14:1         | <i>nd</i>                          | <i>nd</i> | 2.60 $\pm$ 0.58   | <i>nd</i>        | 0.84 $\pm$ 0.21      | <i>nd</i>       |
| Z7-14:1         | 5.02 $\pm$ 0.92                    | <i>nd</i> | 1.24 $\pm$ 0.36   | <i>nd</i>        | 0.60 $\pm$ 0.22      | <i>nd</i>       |
| Z9-14:1         | 20.4 $\pm$ 5.2                     | <i>nd</i> | 58.1 $\pm$ 16.1   | <i>nd</i>        | 106 $\pm$ 21         | <i>nd</i>       |
| 14:             | 128 $\pm$ 30                       | <i>nd</i> | 158 $\pm$ 45      | <i>nd</i>        | 456 $\pm$ 105        | <i>nd</i>       |
| Z7-16:1         | <i>nd</i>                          | <i>nd</i> | 25.6 $\pm$ 7.3    | <i>nd</i>        | 27.4 $\pm$ 5.7       | <i>nd</i>       |
| Z9-16:1         | 817 $\pm$ 60                       | <i>nd</i> | 67.5 $\pm$ 16.3   | <i>nd</i>        | 134 $\pm$ 40         | <i>nd</i>       |
| Z11-16:1        | 20.2 $\pm$ 2.7                     | <i>nd</i> | 11.9 $\pm$ 6.5    | <i>nd</i>        | 136 $\pm$ 22         | <i>nd</i>       |
| 16:             | 662 $\pm$ 112                      | <i>nd</i> | 430 $\pm$ 108     | 13.82 $\pm$ 4.39 | 1333 $\pm$ 194       | 42.7 $\pm$ 11.8 |
| Z9,Z12-18:2     | 74.0 $\pm$ 7.5                     | <i>nd</i> | 76.3 $\pm$ 18.2   | 1.12 $\pm$ 0.30  | 303 $\pm$ 37         | 4.35 $\pm$ 1.33 |
| Z9,Z12,Z15-18:3 | 245 $\pm$ 49                       | <i>nd</i> | 597 $\pm$ 132     | 9.81 $\pm$ 2.32  | 1678 $\pm$ 435       | 32.2 $\pm$ 10.7 |
| Z9-18:1         | 788 $\pm$ 111                      | <i>nd</i> | 1217 $\pm$ 269    | <i>nd</i>        | 2951 $\pm$ 487       | <i>nd</i>       |
| Z11-18:1        | 134 $\pm$ 8                        | <i>nd</i> | 40.4 $\pm$ 19.3   | <i>nd</i>        | 232 $\pm$ 30         | <i>nd</i>       |
| Z13-18:1        | <i>nd</i>                          | <i>nd</i> | 31.7 $\pm$ 15.7   | <i>nd</i>        | 69.5 $\pm$ 15.5      | <i>nd</i>       |
| 18:             | 60.8 $\pm$ 8.8                     | <i>nd</i> | 119 $\pm$ 19      | <i>nd</i>        | 224 $\pm$ 34         | <i>nd</i>       |
| Z11-20:1        | <i>nd</i>                          | <i>nd</i> | 1.33 $\pm$ 0.39   | <i>nd</i>        | 5.29 $\pm$ 0.68      | <i>nd</i>       |
| Z13-20:1        | <i>nd</i>                          | <i>nd</i> | 0.66 $\pm$ 0.34   | <i>nd</i>        | 4.40 $\pm$ 1.59      | 0.79 $\pm$ 0.47 |
| Z15-20:1        | <i>nd</i>                          | <i>nd</i> | 0.18 $\pm$ 0.12   | <i>nd</i>        | 4.01 $\pm$ 1.56      | 0.56 $\pm$ 0.11 |
| 20:             | 5.02 $\pm$ 0.21                    | <i>nd</i> | 3.37 $\pm$ 1.06   | <i>nd</i>        | 9.97 $\pm$ 2.24      | 2.10 $\pm$ 0.79 |
| Z13-22:1        | <i>nd</i>                          | <i>nd</i> | <i>nd</i>         | <i>nd</i>        | 0.54 $\pm$ 0.19      | <i>nd</i>       |
| Z15-22:1        | <i>nd</i>                          | <i>nd</i> | <i>nd</i>         | <i>nd</i>        | 1.50 $\pm$ 0.49      | <i>nd</i>       |
| Z17-22:1        | <i>nd</i>                          | <i>nd</i> | <i>nd</i>         | <i>nd</i>        | 0.15 $\pm$ 0.07      | <i>nd</i>       |
| 22:1 (sum)      | <i>nd</i>                          | <i>nd</i> | <i>nd</i>         | <i>nd</i>        |                      | 0.81 $\pm$ 0.35 |
| 22:             | <i>nd</i>                          | <i>nd</i> | 0.17 $\pm$ 0.08   | <i>nd</i>        | 1.64 $\pm$ 0.56      | 0.78 $\pm$ 0.46 |
| 24:             | <i>nd</i>                          | <i>nd</i> | <i>nd</i>         | <i>nd</i>        | 0.65 $\pm$ 0.35      | <i>nd</i>       |
| 26:             | <i>nd</i>                          | <i>nd</i> | <i>nd</i>         | <i>nd</i>        | 0.92 $\pm$ 0.50      | <i>nd</i>       |
| 28:             | <i>nd</i>                          | <i>nd</i> | <i>nd</i>         | <i>nd</i>        | 1.07 $\pm$ 0.64      | <i>nd</i>       |

1097

1098

1099 **Supplementary Data 1:** Synthetic nucleotide sequences. Restriction sites are underlined.

1100 *BlucFAR-A1-opt* (codon-optimized for yeast)

1101 GGATCCAACACTGAGTTCACTGAAAAGTCTAACAAGGTCAACTCCATCGAAGGTTTCTACGCTGG  
 1102 TACAGGTATCTTTATCACAGGTGCCTCAGGTTTTGTTCGGTAAAGGTTTGTGGAAAAGTTGATCA  
 1103 GAGTTTGTCTAGAAATCGTTGTATTATTCATCTTGGTTAGACCAAAGAAACATCAAACAATGGAA  
 1104 CAAAGATACAAGGAAATCATGGATGACCCATCTTTGATGACATCAAAGCTAAGAATCCATCCGC  
 1105 ATTGAAAAAGGTCCATCCTGTTGAAGGTGACATTTCCCTTACCAAAGTTGGGTTTGTAGTCAAGAAG  
 1106 ATAGAAACATGTTGATAGAAAACGTCAACATCTTGTTCACGTTGCTGCATCTTTGAACTTCAAG

1107 GAACCATTGAACGCCGCTGTAAATACTAACGTCAAGGGTACATTTTCTATAATCGAATTGTGTAA  
1108 CGAATTGAAGCATGTTATATCAGCTGTACACGTCTCTACAGCATATTCAAATGCCAACTTGCCTG  
1109 AAATAGAAGAAAAGGTTTACTCCACTATCTTACAACCATCTTCAGTAATTGAAACATGCGACAGT  
1110 TTGGATAAGGAATTGATTAAGTTGTTGGAAGAAAAGATTTTGAAAATACATCCTAACACGTACAC  
1111 CTTCACGAAGAATTTGGCAGAACAATCTTGTCCAGTTCTTCAACTAECTTCCCAATAGCAATCG  
1112 TTAGACCTTCTATCATTTCCGCCAGTTTAAAAGAACCATGTCCTGGTTGGTTGGGTAATATTACA  
1113 GCCCACATAGCTTTGGGTTGTTTATTTCAAGAGGTTTCGCCAAGATCACCTTAGCTAACCCCTGA  
1114 CACTATCACAGATACCGTACCATTAGACTATGTCGTTGATACAATTTTGTGTGCAGCCTGGCATG  
1115 TTACCTTGCACAGAGATATGAACGTTAAGGTATACAACCTGCACCAATAACGCCAGACCAATTAAT  
1116 TACGGTGAATTGAAGGACACTTTTGTCAAGTACGCTATTCAAATACCTATGGATGGTTTAGTTTG  
1117 GTATCCATGTTGCGCAATGGTTTCTAACAGATACGTATACTCAATCTTGACCTTATTCTTGCATA  
1118 CTTTGCCTGCTTTTATTATGGATATTTTCTTAAGATTGCAAGGTTCAAAGCCAAGAATGATGAAG  
1119 ATCTCTAAGTACTACGATACAATGTCAATCGTTACCAACTACTTCTCCACTAGACAATGGAGTTT  
1120 CAAAAGGATAACGTTATTAATATGATGAAAGAAGTCAAGACTTTGGAAGATTCTGACATCGTTA  
1121 GATTAGATTTGCAAGATATGGACTGGGATAAGTACATCGCTATATGCGTTATCGGTATCAAAAAG  
1122 TTTATTTTCAAAGAAGACCCAAAGTCCTTAGATGCTGCATTGAGAAGATTGAGTATCTTTTACTG  
1123 GATTCATCAAATGACTAAAGCCTTCGCTATTATTATCTTATTGACCATTATTTTGAGAGTTATGT  
1124 ATTGAGAATTC  
1125

1126 *BlucFAR-A2-opt (codon-optimized for yeast)*

1127 GGATCCGACACCATTAACAGAGAAAAGAACGAAAACGCCATTAACAAGGGTTTGAACAAGTTGAA  
1128 TACATTAGAAGAATTTTACGTCCGTTAGTGGTATTTTGTAACTGGTGCACAGGTTTTGTTGGTA  
1129 AAGCTGTTTTGGAAAAGTTGATCAGAATGTGTCCAAGAATTGCTGCAATTTTCTTGTTGTTTAGA  
1130 CCAAAGACTGATGAAACAATCGAACAAAGATTCAAGAAATTGATTGATGATCCAATCTATGATGA  
1131 TATCAAGGCAAAGCATCCATCAACTTTGTCTAGAGTTTATCCAATGAGAGGTGACTTGTCAATTGC  
1132 CAGATTTGGGTTTGTCTAGAGAAGATAGAAAATTTGTTGTTGGAAAAGGTTAACATCGTTTTCCAT  
1133 GCTGCAGCTACTGTTATGTTAATGAACCATTGCAAGTTACAATTAATGTTAACACTAAAGGTAC  
1134 AGCTAGAGTTATTGATTTGTGGAACGAATTGAAGCATCCAATCTCATTTCGTTTCATGTTTCAACTG  
1135 CATTTTCTAACGCTAACATCCATGAAATCGGTGAAAGAGTTTACACTACATCATTGAAACCATCT  
1136 GAAGTTATTGATATTTGTAATAAGTTTGATAAAACATCTATTAATCAAATCGAAAAGAAAATTTT  
1137 GAAAACCTTATCCAAATATCTATACTTTTTTCTAAAAATTTGGCAGAACAATCGTTGCTTCTAACT  
1138 GTAAGGATATGCCAGTTGCTATTGTTAGACCATCAGTTATTGGTCCATCTATGGAAGAACCATGT  
1139 CCAGGTTGGATTCAAACATCTCTGCAATCACTGGTATCATGGTTTTGATCGGTAGAGGTTGTGC  
1140 TACAGGTATTAGAGGTAGAAGAGATGGTAGAGTTGATGTTGTTCCATTGGATTACGTTGTTGATA  
1141 TGATCATCTGTACTGCATGGCATGTTACATTGCATCCAAAGCATGAAGTTAAGGTTTACAACCTGT  
1142 ACATCTTCAGCTAACCCAATTAGATGGGGTCAAATGCAACAATTGGTTTTGAAGCATTCAAGAGA  
1143 AACTCCATTAAACGATACATTGTGGTATCCAAGATGTCCAATCATCGCAAATAAGTACATTTTCA  
1144 ATGTTTTATGTGTTATCCCATACGTTTTGCCAGCTTTTATTATCGATATTTTCTTGAGATTGAGA  
1145 GGTCTAAGCCAATCATGATGAAGTTGTTGAAGTTCGGTTACAAGTTGTCTACTTCAGTTTCTCA  
1146 TTTCACTATGAACGAATGGACATTCCAAAGAGATAACTGTTTCAAGATTTGGCATCTAAGGTTAAGA  
1147 TGTTGCATGATTTCAGATATGGTTAAATTAGATTTGAGAGATATGAAGTGGGAAAAGTACATCGTT  
1148 ATATATTTGATGGGTATTAGAAAGTTTATTTTGAACAAGAATTTCAACCAACAGCTAGACAAAG  
1149 ATTGTCTAGATTGTAAGTTCATCAAATCACTAAGATTTTCAAGGATCATCAGTTTGTATGGA  
1150 TTATTTTGTATTTTCGTCTATTGAGAATTC  
1151

1152 *BlapFAR-A1*

1153 GGATCCAATACAAAACCTTAATGAAAACGAGATAAATGAAAATTTACGTAATGTGAATTCATTGG

1154 GGGATTCTACGCCGGAAGACTGGAATTCCTTATTACTGGTGGGACAGGTTTCGTGGGCAAAGGACTCC  
1155 TCGAAAAACTGATACGCACGTGTTACACATCGCTGCTATTTTTATATTGATCCGTCCGAAACGT  
1156 AACCAAACGATAGAACAACGATTTAAGAAGATAATAGATGATCCGATTTTCGATGGTGTGAGAGC  
1157 ACAAACCAGCAATTTTCTATAAAAATTCATCTCGTGGAGGGCGACGTGACTCTACCAGATTTAG  
1158 GTCTTTTGCAAAAAGACAGAGATATGTTGATAGAGAATGTAAACATAGTGTTCACATTGCGGCC  
1159 ACTATAAATTTCCATCAACCATTGGATATGATTGTCAATGTAAATGTGAAAGGTACCGCTAATAT  
1160 TATCAAACGTGTGCAAGGAACTCAAGCATGTAATTAGCGTTGTCTATGTGAGCACAGCTTACAGTA  
1161 ATCCGAATCTATCAGACATCGAAGAAAAGGTCTACACCACGAATCTAGATCCCTCTCTCGTGATG  
1162 GATATATGCGACCGACAAGACAAAGAATTGATTAATCTGATCGAAGAAAGAATTTTAAAAACGCA  
1163 TCCGAACACATACACGTTCCACCAAGAATCTTGCAAGAGCAGACAATATCCAACAATAGCAAAGGAT  
1164 TGACTGTTGCGATAGTGCAGCAAGTATAATTTCTTCCCTCGCTAAAAGAACCGTTCCCTGGTTGG  
1165 TTGGTATCTTTTGCTGGACAATCAGGTATCTTCAAGAATATCGGCAATGGTATGGCAAAAGTACT  
1166 ATTGGGTAGGGGAGATGTAATATCAGATATAGTGCCTGTTGATTATGTAGTCGACGCGATAATGT  
1167 GTGCCGCGTGGCACGTACGCTACAAATTGATAATAATGTCAAAGTTTACAACGTGACGAGCAGC  
1168 GCACGTCCCATCAAATTGGGTGAAATCGTAAATATCTTCGTGGAATGTAGCAGAGAAATACCGAT  
1169 GAAAAATACGTTGTGGTATCCGAGTTGTACGATAGTAGCAAACAGATTTGTTTACAATGTACTGA  
1170 ATATACTTCTAAATGTTTTACCTGCGTTTGCCGTGGATATCTTTTTAAGGCTTCGAGGTGGTAAA  
1171 CCAATGGCAATGAATATGAACAAATATTACAATAAATTGGTCGTAGCGACAAGCTACTTCAACTC  
1172 GAATGAATGGTCCTTCAAAAAGAGATAACATTGCCGATATGATAAACAAGGTGAATACCTTGGAAAG  
1173 ATGGAAATATTGTTAAACTGGACTTGCAGGATATGGTTTGGAGGAAATATATAGCAAATTACTTG  
1174 GCGGGAATTAAGAAATTTATTCTGAAAGAAGACCCTAAATCTATAAATGCGGCGCCGTAAGCGGC  
1175 CGC  
1176

1177
